# Supplementary material
Source: Royal Society of Chemistry journal article supplement (doi:10.1039/d6cp00759g)
Supplement: d6cp00759g1.pdf [file d6cp00759g1.pdf]

## Supporting Information

### Photophysical Tuning via Piperazine Nitrogen Torsion in a Ferrocene– Aminonaphthalimide Derivative

Christina Eleftheria Tzeliou <sup>a</sup>, Demeter Tzeli <sup>a, b</sup>

<sup>[a]</sup> Laboratory of Physical Chemistry, Department of Chemistry, National and Kapodistrian University of Athens, Panepistimiopolis Zografou, Athens 157 84, Greece

<sup>[b]</sup> Theoretical and Physical Chemistry Institute, National Hellenic Research Foundation, 48 Vassileos Constantinou Ave., Athens 116 35, Greece

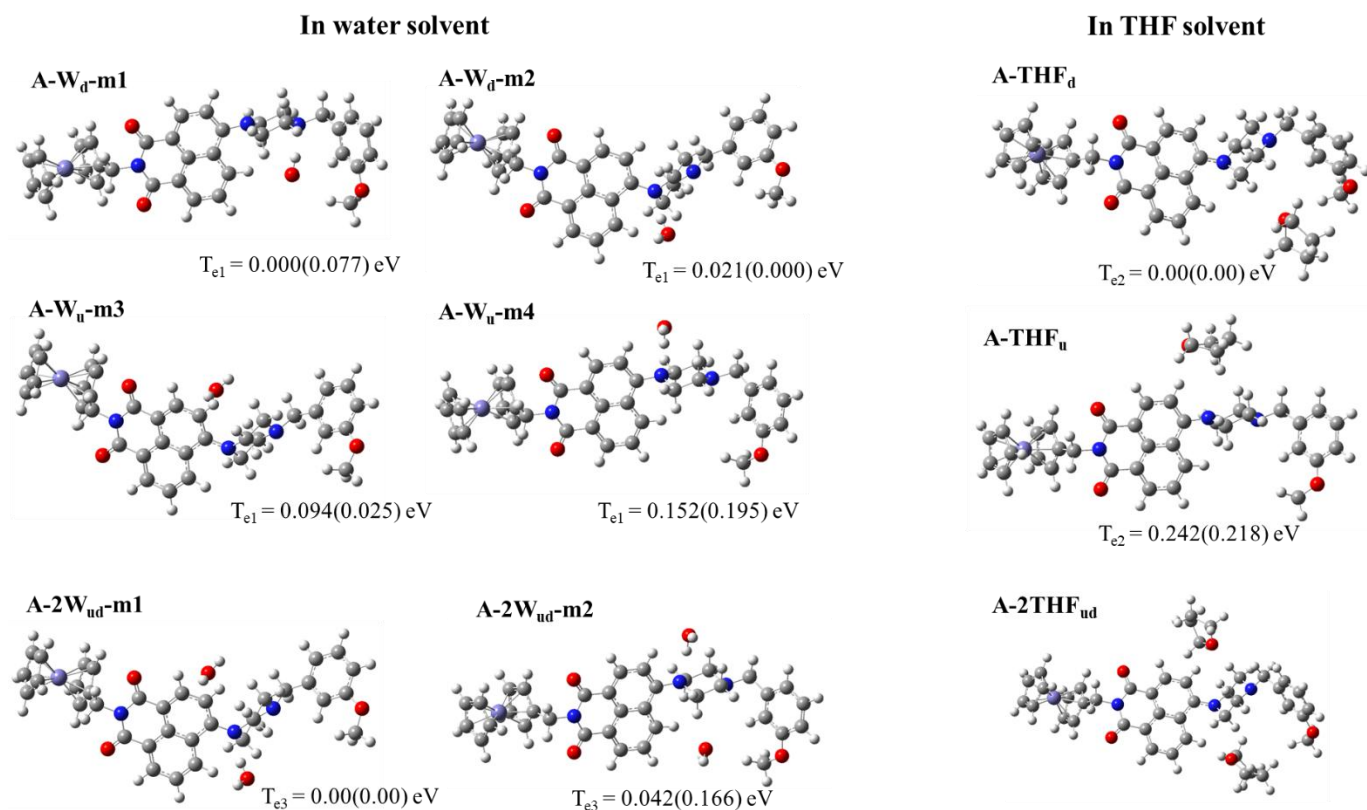

**Figure S1.** Calculated minimum structures of molecule A with explicit addition of one and two water or THF solvent molecules and relative energies  $T_e$  at the PBE0/6-31G(d,p) and in parenthesis at the PBE0/def2tzvp methods in water or THF solvent.

**Table S1.** Total energies (hartree) of the A-W, A-2W, A-THF and A-2THF molecular systems in water or THF solvent at the PBE0/6-31G(d,p) and PBE0/def2-tzvp levels of theory.

| Molecule                           | PBE0/6-31G(d,p) | PBE0/def2-tzvp |
|------------------------------------|-----------------|----------------|
| A-W <sub>d</sub> -m <sub>1</sub>   | -3081.371057    | -3082.093155   |
| A-W <sub>u</sub> -m <sub>2</sub>   | -3081.370295    | -3082.095990   |
| A-W <sub>d</sub> -m <sub>3</sub>   | -3081.367602    | -3082.095070   |
| A-W <sub>u</sub> -m <sub>4</sub>   | -3081.365476    | -3082.088812   |
| A-2W <sub>ud</sub> -m <sub>1</sub> | -3157.719390    | -3158.482490   |
| A-2W <sub>ud</sub> -m <sub>2</sub> | -3157.717852    | -3158.476399   |
| A-THF <sub>u</sub>                 | -3237.202079    | -3237.966326   |
| A-THF <sub>d</sub>                 | -3237.210975    | -3237.974336   |
| A-2THF <sub>ud</sub>               | -3469.406774    | -              |

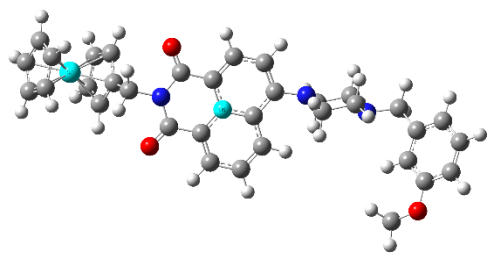

**Figure S2.** Charge transfer distance  $d_{CT}$  ( $\text{Fe}\dots\text{C}_5$ ), a diagnostic index for charge transfer

**Table S2.** Charge transfer distance  $d_{CT}$  ( $\text{Fe}\dots\text{C}_5$ ), a diagnostic index for charge transfer

| Molecule                       | Methodology                | Distance ( $\text{\AA}$ )[ $\text{Fe}\dots\text{C}_5$ ] |
|--------------------------------|----------------------------|---------------------------------------------------------|
| A ( $\text{H}_2\text{O}$ )     | PBE0/6-31G(d, p)           | 7.065                                                   |
| A-2 $\text{W}_{ud}\text{-m}_1$ | PBE0/6-31G(d, p)           | 7.058                                                   |
| A-2 $\text{THF}_{ud}$          | PBE0/6-31G(d, p)           | 7.070                                                   |
| A (THF)                        | PBE0/6-31G(d, p)           | 7.065                                                   |
|                                | TPSSH/6-31G(d, p)          | 7.091                                                   |
|                                | $\omega$ B97XD/6-31G(d, p) | 7.044                                                   |

**Table S3.** Total electronic energies (E, hartree), total free energies (G, Hartree),  $\Delta E$  (eV) and  $\Delta G$ (eV) of the **A** molecule in water or THF solvent at the PBE0/6-31G(d,p) level of theory.

|                     | <b>E</b>     | <b>G</b>     | <b><math>\Delta E</math></b> | <b><math>\Delta G</math></b> |
|---------------------|--------------|--------------|------------------------------|------------------------------|
| A (typeI in water)  | -3005.009751 | -3004.465463 | 0.230                        | 0.191                        |
| A (typeII in water) | -3005.018195 | -3004.472489 | 0.000                        | 0.000                        |
| A (ts in water)     | -3005.009179 | -3004.458641 | 0.245                        | 0.377                        |
| A (typeI in thf)    | -3005.006217 | -3004.459715 | 0.218                        | 0.247                        |
| A (typeII in thf)   | -3005.014214 | -3004.468807 | 0.000                        | 0.000                        |
| A (ts)              | -3005.004004 | -3004.454132 | 0.278                        | 0.399                        |

**Table S4.** Rate Constants for the **A** interconversion (**I**  $\rightarrow$  **II** & **II**  $\rightarrow$  **I**) at the PBE0/6-31G(d,p) level of theory. The solvent is implicitly included.

|                                           | <b>Barrier (eV)</b> | <b><math>\Delta G^\ddagger</math> (kJ/mol)</b> | <b>Rate Constant (s<sup>-1</sup>)</b> | <b>Lifetime (<math>\mu</math>s)</b> | <b>Interconversion</b> |
|-------------------------------------------|---------------------|------------------------------------------------|---------------------------------------|-------------------------------------|------------------------|
| <b>I</b> $\rightarrow$ <b>II</b> in THF   | 0.152               | 14.7                                           | $1.5 \times 10^8$                     | 0.007                               | Fast                   |
| <b>II</b> $\rightarrow$ <b>I</b> in THF   | 0.399               | 38.5                                           | $3.2 \times 10^3$                     | 310                                 | Very slow              |
| <b>I</b> $\rightarrow$ <b>II</b> in water | 0.186               | 18.0                                           | $2.0 \times 10^7$                     | 0.05                                | Moderately fast        |
| <b>II</b> $\rightarrow$ <b>I</b> in water | 0.377               | 36.4                                           | $1.3 \times 10^4$                     | 77                                  | Slow                   |

**Table S5.** Main absorption and charge transfer peaks,  $\lambda$  (nm), energy differences  $\Delta E$  (eV), f-values and the corresponding main excitations of the absorption spectrum of the **A**, **A-W**, **A-2W**, **A-THF** and **A-2THF** molecular systems in water or THF solvent at the PBE0/6-31G(d,p) level of theory.

| Molecule                               | Method          | solvent | $\lambda$ (nm) | $\Delta E$ | f      |                               |
|----------------------------------------|-----------------|---------|----------------|------------|--------|-------------------------------|
| <b>A</b>                               | PBE0            | THF     | 443.7          | 2.79       | 0.0009 | 0.969  H $\rightarrow$ L>     |
|                                        | PBE0            | THF     | 333.5          | 3.72       | 0.4260 | 0.989  H-6 $\rightarrow$ L>   |
|                                        | PBE0            | THF     | 225.0          | 5.51       | 0.4283 | 0.737  H-6 $\rightarrow$ L+1> |
|                                        | TPSSh           | THF     | 353.5          | 3.51       | 0.2344 | 0.768  H-6 $\rightarrow$ L>   |
|                                        | $\omega$ B97X-D | THF     | 308.9          | 4.01       | 0.5029 | 0.916  H-5 $\rightarrow$ L>   |
|                                        | PBE0-D3         | THF     | 333.5          | 3.72       | 0.4250 | 0.986  H-6 $\rightarrow$ L>   |
|                                        | TPSSh-D3        | THF     | 353.9          | 3.50       | 0.2740 | 0.833  H-6 $\rightarrow$ L>   |
|                                        | PBE0            | water   | 438.8          | 2.83       | 0.0002 | 0.806  H $\rightarrow$ L>     |
| <b>A-W<sub>d</sub>-m<sub>1</sub></b>   | PBE0            | water   | 333.5          | 3.72       | 0.4216 | 0.989  H-6 $\rightarrow$ L>   |
|                                        | PBE0            | water   | 224.4          | 5.52       | 0.4388 | 0.739  H-6 $\rightarrow$ L+1> |
|                                        | PBE0            | water   | 430.2          | 2.88       | 0.0007 | 0.989  H $\rightarrow$ L>     |
| <b>A-W<sub>d</sub>-m<sub>2</sub></b>   | PBE0            | water   | 334.2          | 3.71       | 0.4208 | 0.981  H-5 $\rightarrow$ L>   |
|                                        | PBE0            | water   | 417.7          | 2.97       | 0.0031 | 0.965  H $\rightarrow$ L>     |
| <b>A-W<sub>u</sub>-m<sub>3</sub></b>   | PBE0            | water   | 399.9          | 3.10       | 0.3391 | 0.990  H-2 $\rightarrow$ L>   |
|                                        | PBE0            | water   | 474.7          | 2.61       | 0.0001 | 0.989  H $\rightarrow$ L>     |
| <b>A-W<sub>u</sub>-m<sub>4</sub></b>   | PBE0            | water   | 417.2          | 2.97       | 0.3661 | 0.879  H-2 $\rightarrow$ L>   |
|                                        | PBE0            | water   | 446.2          | 2.78       | 0.0009 | 0.982  H $\rightarrow$ L>     |
| <b>A-2W<sub>ud</sub>-m<sub>1</sub></b> | PBE0            | water   | 332.8          | 3.73       | 0.4218 | 0.979  H-5 $\rightarrow$ L>   |
|                                        | PBE0            | water   | 424.9          | 2.92       | 0.0023 | 0.984  H $\rightarrow$ L>     |
| <b>A-2W<sub>ud</sub>-m<sub>2</sub></b> | PBE0            | water   | 401.8          | 3.09       | 0.3231 | 0.991  H-2 $\rightarrow$ L>   |
|                                        | PBE0            | water   | 433.2          | 2.86       | 0.0005 | 0.958  H $\rightarrow$ L>     |
| <b>A-THF<sub>u</sub></b>               | PBE0            | water   | 333.7          | 3.72       | 0.2547 | 0.733  H-5 $\rightarrow$ L>   |
|                                        | PBE0            | THF     | 433.2          | 2.86       | 0.0005 | 0.997  H $\rightarrow$ L>     |
| <b>A-THF<sub>d</sub></b>               | PBE0            | THF     | 334.2          | 3.71       | 0.4152 | 0.981  H-6 $\rightarrow$ L>   |
|                                        | PBE0            | THF     | 418.9          | 2.96       | 0.3914 | 0.812  H-2 $\rightarrow$ L>   |
| <b>A-2THF<sub>ud</sub></b>             | PBE0            | THF     | 421.5          | 2.94       | 0.4067 | 0.988  H $\rightarrow$ L>     |

**Table S6.** Main absorption and charge transfer peaks,  $\lambda$  (nm), cLR corrected values (eV) and  $\lambda$  (nm) of the absorption spectrum of the **A**, **A-W**, **A-2W**, **A-THF** and **A-2THF** molecular systems in water or THF solvent at the PBE0/6-31G(d, p) level of theory.

| <b>Molecule</b> | <b><math>\lambda</math> (nm)</b> | <b><math>\Delta E</math></b> | <b><math>\Delta E_{\text{cLR}}</math></b> | <b><math>\lambda_{\text{cLR}}</math></b> | <b>Shift (<math>\lambda</math>)</b> |
|-----------------|----------------------------------|------------------------------|-------------------------------------------|------------------------------------------|-------------------------------------|
| A-Wd-m1         | 334.2                            | 3.71                         | 3.71                                      | 334.0                                    | <b>0.2</b>                          |
| A-Wd-m2         | 399.9                            | 3.10                         | 3.05                                      | 406.0                                    | <b>-6.1</b>                         |
| A-Wu-m3         | 417.2                            | 2.97                         | 2.95                                      | 419.9                                    | <b>-2.7</b>                         |
| A-Wu-m4         | 332.8                            | 3.73                         | 3.76                                      | 329.5                                    | <b>3.3</b>                          |
| A-2Wud-m1       | 401.8                            | 3.09                         | 3.03                                      | 409.9                                    | <b>-8.1</b>                         |
| A-2Wud-m2       | 333.7                            | 3.72                         | 3.72                                      | 333.7                                    | <b>0</b>                            |
| A-THFd          | 418.9                            | 2.96                         | 2.95                                      | 420.5                                    | <b>-1.6</b>                         |
| A-THFu          | 334.2                            | 3.71                         | 3.71                                      | 334.0                                    | <b>0.2</b>                          |
| A-2THFud        | 421.5                            | 2.94                         | 2.94                                      | 421.6                                    | <b>0.1</b>                          |

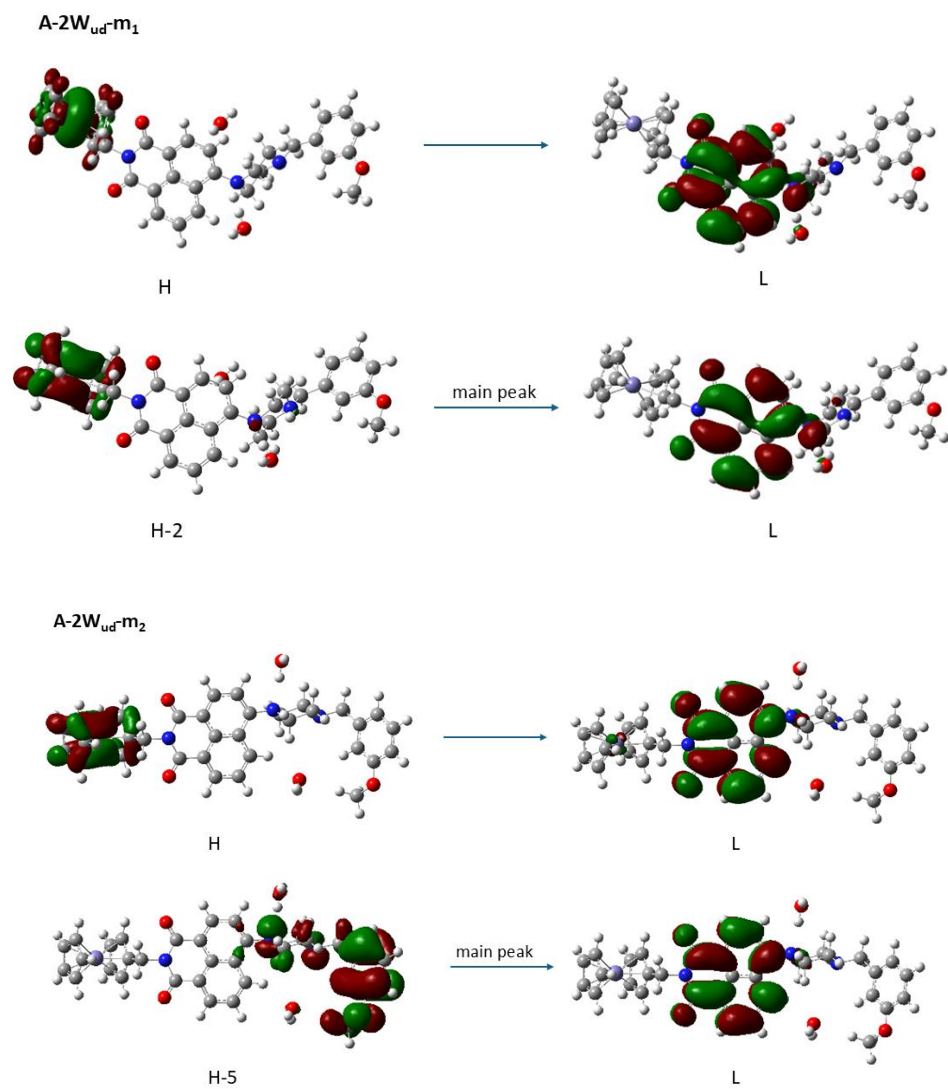

**Figure S3.** Natural Transition Orbitals involved in main UV-vis absorption peaks of A-2W<sub>ud</sub>-m<sub>1</sub> and A-2W<sub>ud</sub>-m<sub>2</sub> at PBE0/6-31G (d, p) in water solvent.

**Table S7. Geometries****A** (PBE0/6-31G(d,p) in THF solvent type I)

| Center<br>Number | Atomic<br>Number | Atomic<br>Type | Coordinates (Angstroms) |           |           |
|------------------|------------------|----------------|-------------------------|-----------|-----------|
|                  |                  |                | X                       | Y         | Z         |
| 1                | 6                | 0              | 8.401699                | -0.839683 | 0.260282  |
| 2                | 6                | 0              | 9.487981                | -1.443283 | -0.367797 |
| 3                | 6                | 0              | 8.301886                | 0.556152  | 0.286560  |
| 4                | 6                | 0              | 10.477155               | -0.654053 | -0.957704 |
| 5                | 1                | 0              | 9.562425                | -2.527057 | -0.397763 |
| 6                | 6                | 0              | 9.288843                | 1.338934  | -0.311251 |
| 7                | 1                | 0              | 7.435881                | 0.998248  | 0.766249  |
| 8                | 6                | 0              | 10.385362               | 0.728640  | -0.934287 |
| 9                | 1                | 0              | 11.324829               | -1.124812 | -1.447749 |
| 10               | 8                | 0              | 9.275238                | 2.695889  | -0.340223 |
| 11               | 6                | 0              | 8.187119                | 3.355971  | 0.273982  |
| 12               | 1                | 0              | 7.234056                | 3.086951  | -0.197388 |
| 13               | 1                | 0              | 8.131857                | 3.131336  | 1.345988  |
| 14               | 1                | 0              | 8.365031                | 4.423418  | 0.139745  |
| 15               | 6                | 0              | 7.354363                | -1.675995 | 0.958403  |
| 16               | 1                | 0              | 7.564199                | -1.673881 | 2.036610  |
| 17               | 1                | 0              | 7.448513                | -2.727598 | 0.627091  |
| 18               | 6                | 0              | 5.542799                | -1.326012 | -0.591516 |
| 19               | 6                | 0              | 5.067069                | -1.799737 | 1.697181  |
| 20               | 6                | 0              | 4.176715                | -0.684132 | -0.766256 |
| 21               | 1                | 0              | 5.479688                | -2.395234 | -0.871844 |
| 22               | 1                | 0              | 6.259671                | -0.843216 | -1.263219 |
| 23               | 6                | 0              | 3.693097                | -1.162779 | 1.564634  |
| 24               | 1                | 0              | 4.979656                | -2.886811 | 1.507381  |
| 25               | 1                | 0              | 5.429791                | -1.666203 | 2.722578  |
| 26               | 1                | 0              | 3.809952                | -0.870109 | -1.780216 |
| 27               | 1                | 0              | 4.283786                | 0.407765  | -0.643239 |
| 28               | 1                | 0              | 2.980936                | -1.686209 | 2.209665  |
| 29               | 1                | 0              | 3.757961                | -0.117720 | 1.914078  |
| 30               | 7                | 0              | 6.004234                | -1.168714 | 0.780602  |
| 31               | 7                | 0              | 3.245933                | -1.276703 | 0.183906  |
| 32               | 6                | 0              | 1.856873                | -1.114726 | -0.070967 |
| 33               | 6                | 0              | 1.166008                | 0.133930  | 0.049890  |
| 34               | 6                | 0              | 1.151524                | -2.240122 | -0.455827 |
| 35               | 6                | 0              | 1.799627                | 1.341648  | 0.434845  |
| 36               | 6                | 0              | -0.231485               | 0.172997  | -0.230767 |
| 37               | 6                | 0              | -0.223681               | -2.192428 | -0.729932 |
| 38               | 1                | 0              | 1.695791                | -3.174907 | -0.540400 |
| 39               | 6                | 0              | 1.091046                | 2.518285  | 0.538950  |

|    |    |   |           |           |           |
|----|----|---|-----------|-----------|-----------|
| 40 | 1  | 0 | 2.861018  | 1.338793  | 0.650996  |
| 41 | 6  | 0 | -0.938950 | 1.392645  | -0.116971 |
| 42 | 6  | 0 | -0.912684 | -1.002666 | -0.620487 |
| 43 | 1  | 0 | -0.763309 | -3.084933 | -1.029615 |
| 44 | 6  | 0 | -0.285660 | 2.547142  | 0.263676  |
| 45 | 1  | 0 | 1.598440  | 3.430317  | 0.836229  |
| 46 | 1  | 0 | -0.855230 | 3.467120  | 0.343935  |
| 47 | 6  | 0 | -2.358764 | -0.972921 | -0.911391 |
| 48 | 6  | 0 | -2.387210 | 1.447678  | -0.402064 |
| 49 | 8  | 0 | -2.984684 | -1.969367 | -1.244372 |
| 50 | 8  | 0 | -3.036949 | 2.479427  | -0.307965 |
| 51 | 7  | 0 | -2.998851 | 0.259851  | -0.796659 |
| 52 | 6  | 0 | -4.439853 | 0.302774  | -1.078368 |
| 53 | 1  | 0 | -4.634814 | -0.450851 | -1.841363 |
| 54 | 1  | 0 | -4.654074 | 1.293309  | -1.479935 |
| 55 | 6  | 0 | -5.264092 | 0.040306  | 0.142645  |
| 56 | 6  | 0 | -5.734472 | 1.019684  | 1.070008  |
| 57 | 6  | 0 | -5.713017 | -1.236648 | 0.599044  |
| 58 | 1  | 0 | -5.565753 | 2.085352  | 0.989564  |
| 59 | 6  | 0 | -6.478618 | 0.351869  | 2.082058  |
| 60 | 1  | 0 | -5.525387 | -2.177991 | 0.099833  |
| 61 | 6  | 0 | -6.465290 | -1.043122 | 1.790921  |
| 62 | 1  | 0 | -6.990102 | 0.823103  | 2.911241  |
| 63 | 1  | 0 | -6.964576 | -1.816072 | 2.360551  |
| 64 | 6  | 0 | -8.836759 | -1.021063 | -0.546092 |
| 65 | 6  | 0 | -8.083572 | -0.373115 | -1.566867 |
| 66 | 1  | 0 | -7.579098 | -0.860413 | -2.391069 |
| 67 | 6  | 0 | -8.084564 | 1.025482  | -1.293741 |
| 68 | 1  | 0 | -7.580983 | 1.787663  | -1.874064 |
| 69 | 6  | 0 | -9.303141 | -0.023781 | 0.357318  |
| 70 | 1  | 0 | -9.885945 | -0.198984 | 1.252164  |
| 71 | 6  | 0 | -8.838276 | 1.240790  | -0.104304 |
| 72 | 1  | 0 | -9.005255 | 2.194775  | 0.378446  |
| 73 | 1  | 0 | -9.002546 | -2.086785 | -0.457837 |
| 74 | 26 | 0 | -7.277740 | -0.002134 | 0.253842  |
| 75 | 1  | 0 | 11.142288 | 1.356521  | -1.393847 |

-----

**A** (PBE0/6-31G(d,p) in THF solvent type II)

-----

| Center<br>Number | Atomic<br>Number | Atomic<br>Type | Coordinates (Angstroms) |           |          |
|------------------|------------------|----------------|-------------------------|-----------|----------|
|                  |                  |                | X                       | Y         | Z        |
| 1                | 6                | 0              | -7.797293               | -1.375999 | 0.617075 |
| 2                | 6                | 0              | -8.230525               | -1.924365 | 1.821301 |
| 3                | 6                | 0              | -8.461726               | -0.267935 | 0.078484 |
| 4                | 6                | 0              | -9.331842               | -1.373718 | 2.479708 |

|    |   |   |            |           |           |
|----|---|---|------------|-----------|-----------|
| 5  | 1 | 0 | -7.710076  | -2.778768 | 2.245663  |
| 6  | 6 | 0 | -9.556422  | 0.282003  | 0.744386  |
| 7  | 1 | 0 | -8.091988  | 0.149750  | -0.851181 |
| 8  | 6 | 0 | -9.995359  | -0.277720 | 1.951550  |
| 9  | 1 | 0 | -9.670311  | -1.801270 | 3.419324  |
| 10 | 8 | 0 | -10.260115 | 1.355238  | 0.303217  |
| 11 | 6 | 0 | -9.856148  | 1.953501  | -0.911785 |
| 12 | 1 | 0 | -8.831331  | 2.339317  | -0.850452 |
| 13 | 1 | 0 | -9.924025  | 1.249871  | -1.750232 |
| 14 | 1 | 0 | -10.542041 | 2.783596  | -1.083682 |
| 15 | 6 | 0 | -6.646184  | -1.995567 | -0.140700 |
| 16 | 1 | 0 | -7.049749  | -2.606580 | -0.959358 |
| 17 | 1 | 0 | -6.102421  | -2.690703 | 0.526312  |
| 18 | 6 | 0 | -5.001011  | -0.282711 | 0.268849  |
| 19 | 6 | 0 | -4.852669  | -1.612725 | -1.701195 |
| 20 | 6 | 0 | -4.168792  | 0.823324  | -0.369400 |
| 21 | 1 | 0 | -4.331448  | -0.959585 | 0.835677  |
| 22 | 1 | 0 | -5.698477  | 0.166446  | 0.983312  |
| 23 | 6 | 0 | -4.010739  | -0.524903 | -2.357336 |
| 24 | 1 | 0 | -4.196871  | -2.367952 | -1.226323 |
| 25 | 1 | 0 | -5.439887  | -2.125387 | -2.471381 |
| 26 | 1 | 0 | -3.588222  | 1.322667  | 0.406112  |
| 27 | 1 | 0 | -4.836965  | 1.561616  | -0.831067 |
| 28 | 1 | 0 | -3.318572  | -0.945851 | -3.089090 |
| 29 | 1 | 0 | -4.688604  | 0.150758  | -2.895386 |
| 30 | 7 | 0 | -5.759351  | -1.009901 | -0.737092 |
| 31 | 7 | 0 | -3.275512  | 0.285726  | -1.397199 |
| 32 | 6 | 0 | -1.950683  | 0.016477  | -1.112663 |
| 33 | 6 | 0 | -1.109313  | 1.059335  | -0.573609 |
| 34 | 6 | 0 | -1.367961  | -1.223784 | -1.383305 |
| 35 | 6 | 0 | -1.519806  | 2.409256  | -0.485891 |
| 36 | 6 | 0 | 0.223808   | 0.741894  | -0.187627 |
| 37 | 6 | 0 | -0.045171  | -1.498116 | -1.037087 |
| 38 | 1 | 0 | -1.966461  | -2.019706 | -1.810396 |
| 39 | 6 | 0 | -0.694578  | 3.379172  | 0.046122  |
| 40 | 1 | 0 | -2.489629  | 2.693830  | -0.878983 |
| 41 | 6 | 0 | 1.045892   | 1.745495  | 0.376994  |
| 42 | 6 | 0 | 0.747541   | -0.551692 | -0.411644 |
| 43 | 1 | 0 | 0.371656   | -2.483615 | -1.220134 |
| 44 | 6 | 0 | 0.585437   | 3.041795  | 0.506389  |
| 45 | 1 | 0 | -1.031854  | 4.409491  | 0.093142  |
| 46 | 1 | 0 | 1.244498   | 3.788156  | 0.937680  |
| 47 | 6 | 0 | 2.115270   | -0.890102 | -0.015349 |
| 48 | 6 | 0 | 2.419818   | 1.425068  | 0.811596  |
| 49 | 8 | 0 | 2.612184   | -1.996453 | -0.193968 |
| 50 | 8 | 0 | 3.154560   | 2.253185  | 1.335470  |
| 51 | 7 | 0 | 2.857990   | 0.121510  | 0.602979  |
| 52 | 6 | 0 | 4.225901   | -0.204978 | 1.021789  |

|    |    |   |            |           |           |
|----|----|---|------------|-----------|-----------|
| 53 | 1  | 0 | 4.231416   | -1.263792 | 1.280473  |
| 54 | 1  | 0 | 4.437386   | 0.390138  | 1.910515  |
| 55 | 6  | 0 | 5.232797   | 0.078116  | -0.048917 |
| 56 | 6  | 0 | 5.956942   | 1.296147  | -0.225954 |
| 57 | 6  | 0 | 5.637635   | -0.818331 | -1.084686 |
| 58 | 1  | 0 | 5.875146   | 2.166617  | 0.411249  |
| 59 | 6  | 0 | 6.811489   | 1.146087  | -1.353510 |
| 60 | 1  | 0 | 5.271822   | -1.828567 | -1.211449 |
| 61 | 6  | 0 | 6.613545   | -0.161436 | -1.884900 |
| 62 | 1  | 0 | 7.509937   | 1.884350  | -1.725529 |
| 63 | 1  | 0 | 7.135440   | -0.589374 | -2.730942 |
| 64 | 6  | 0 | 8.505177   | -1.807073 | 0.301968  |
| 65 | 6  | 0 | 7.634620   | -1.686716 | 1.423122  |
| 66 | 1  | 0 | 6.943382   | -2.441420 | 1.775097  |
| 67 | 6  | 0 | 7.810342   | -0.386336 | 1.978866  |
| 68 | 1  | 0 | 7.276173   | 0.020518  | 2.827636  |
| 69 | 6  | 0 | 9.218797   | -0.582134 | 0.165052  |
| 70 | 1  | 0 | 9.941174   | -0.349887 | -0.606552 |
| 71 | 6  | 0 | 8.789581   | 0.295805  | 1.201036  |
| 72 | 1  | 0 | 9.128077   | 1.312150  | 1.354433  |
| 73 | 1  | 0 | 8.589498   | -2.668397 | -0.347701 |
| 74 | 26 | 0 | 7.219903   | -0.261322 | 0.045713  |
| 75 | 1  | 0 | -10.849273 | 0.166062  | 2.453748  |

-----

**A** (PBE0/6-31G(d,p) in THF solvent)

| Center<br>Number | Atomic<br>Number | Atomic<br>Type | Coordinates (Angstroms) |           |           |
|------------------|------------------|----------------|-------------------------|-----------|-----------|
|                  |                  |                | X                       | Y         | Z         |
| 1                | 6                | 0              | 8.401527                | -0.840209 | 0.262020  |
| 2                | 6                | 0              | 9.487885                | -1.445114 | -0.364650 |
| 3                | 6                | 0              | 8.302135                | 0.555708  | 0.286059  |
| 4                | 6                | 0              | 10.477559               | -0.657104 | -0.955352 |
| 5                | 1                | 0              | 9.562027                | -2.528957 | -0.392896 |
| 6                | 6                | 0              | 9.289572                | 1.337249  | -0.312554 |
| 7                | 1                | 0              | 7.436061                | 0.998819  | 0.764681  |
| 8                | 6                | 0              | 10.386198               | 0.725652  | -0.934148 |
| 9                | 1                | 0              | 11.325315               | -1.128886 | -1.444274 |
| 10               | 8                | 0              | 9.276431                | 2.694166  | -0.343626 |
| 11               | 6                | 0              | 8.188296                | 3.355586  | 0.269127  |
| 12               | 1                | 0              | 7.235335                | 3.086202  | -0.202239 |
| 13               | 1                | 0              | 8.132505                | 3.132603  | 1.341451  |
| 14               | 1                | 0              | 8.366666                | 4.422759  | 0.133337  |
| 15               | 6                | 0              | 7.353638                | -1.675089 | 0.961019  |

|    |   |   |           |           |           |
|----|---|---|-----------|-----------|-----------|
| 16 | 1 | 0 | 7.563029  | -1.671339 | 2.039306  |
| 17 | 1 | 0 | 7.447591  | -2.727239 | 0.631396  |
| 18 | 6 | 0 | 5.542838  | -1.327038 | -0.590193 |
| 19 | 6 | 0 | 5.065964  | -1.796811 | 1.699080  |
| 20 | 6 | 0 | 4.176927  | -0.685251 | -0.766579 |
| 21 | 1 | 0 | 5.479645  | -2.396702 | -0.868821 |
| 22 | 1 | 0 | 6.260079  | -0.845474 | -1.262388 |
| 23 | 6 | 0 | 3.692403  | -1.159264 | 1.565056  |
| 24 | 1 | 0 | 4.978065  | -2.884132 | 1.510946  |
| 25 | 1 | 0 | 5.428395  | -1.661846 | 2.724393  |
| 26 | 1 | 0 | 3.810483  | -0.873098 | -1.780308 |
| 27 | 1 | 0 | 4.283959  | 0.406904  | -0.645564 |
| 28 | 1 | 0 | 2.979750  | -1.681034 | 2.210889  |
| 29 | 1 | 0 | 3.758021  | -0.113668 | 1.912656  |
| 30 | 7 | 0 | 6.003752  | -1.167646 | 0.781854  |
| 31 | 7 | 0 | 3.245599  | -1.275641 | 0.184424  |
| 32 | 6 | 0 | 1.856806  | -1.113403 | -0.071735 |
| 33 | 6 | 0 | 1.165742  | 0.135047  | 0.050091  |
| 34 | 6 | 0 | 1.151952  | -2.238283 | -0.459003 |
| 35 | 6 | 0 | 1.799269  | 1.342660  | 0.435525  |
| 36 | 6 | 0 | -0.231701 | 0.174174  | -0.230803 |
| 37 | 6 | 0 | -0.223108 | -2.190433 | -0.733803 |
| 38 | 1 | 0 | 1.696378  | -3.172901 | -0.544393 |
| 39 | 6 | 0 | 1.090504  | 2.519101  | 0.540580  |
| 40 | 1 | 0 | 2.860817  | 1.339957  | 0.650903  |
| 41 | 6 | 0 | -0.939407 | 1.393567  | -0.115789 |
| 42 | 6 | 0 | -0.912509 | -1.001077 | -0.622438 |
| 43 | 1 | 0 | -0.762409 | -3.082607 | -1.035058 |
| 44 | 6 | 0 | -0.286305 | 2.547857  | 0.265807  |
| 45 | 1 | 0 | 1.597851  | 3.431074  | 0.838119  |
| 46 | 1 | 0 | -0.856047 | 3.467652  | 0.346938  |
| 47 | 6 | 0 | -2.358567 | -0.971308 | -0.913441 |
| 48 | 6 | 0 | -2.387654 | 1.448617  | -0.400920 |
| 49 | 8 | 0 | -2.984197 | -1.967461 | -1.247843 |
| 50 | 8 | 0 | -3.037690 | 2.480042  | -0.305300 |
| 51 | 7 | 0 | -2.999017 | 0.261113  | -0.796931 |
| 52 | 6 | 0 | -4.440063 | 0.304003  | -1.078443 |
| 53 | 1 | 0 | -4.634894 | -0.448650 | -1.842430 |
| 54 | 1 | 0 | -4.654612 | 1.295020  | -1.478638 |
| 55 | 6 | 0 | -5.264049 | 0.039637  | 0.142332  |
| 56 | 6 | 0 | -5.734345 | 1.017598  | 1.071237  |
| 57 | 6 | 0 | -5.712697 | -1.238040 | 0.596973  |
| 58 | 1 | 0 | -5.565783 | 2.083406  | 0.992316  |
| 59 | 6 | 0 | -6.478141 | 0.348202  | 2.082502  |
| 60 | 1 | 0 | -5.525060 | -2.178629 | 0.096345  |
| 61 | 6 | 0 | -6.464700 | -1.046360 | 1.789322  |
| 62 | 1 | 0 | -6.989467 | 0.818156  | 2.912508  |
| 63 | 1 | 0 | -6.963724 | -1.820215 | 2.357952  |

|    |    |   |           |           |           |
|----|----|---|-----------|-----------|-----------|
| 64 | 6  | 0 | -8.836747 | -1.021212 | -0.547049 |
| 65 | 6  | 0 | -8.083934 | -0.371644 | -1.567072 |
| 66 | 1  | 0 | -7.579636 | -0.857643 | -2.392147 |
| 67 | 6  | 0 | -8.085065 | 1.026549  | -1.291882 |
| 68 | 1  | 0 | -7.581789 | 1.789666  | -1.871239 |
| 69 | 6  | 0 | -9.303041 | -0.025334 | 0.357955  |
| 70 | 1  | 0 | -9.885612 | -0.201940 | 1.252677  |
| 71 | 6  | 0 | -8.838491 | 1.239987  | -0.101925 |
| 72 | 1  | 0 | -9.005510 | 2.193237  | 0.382260  |
| 73 | 1  | 0 | -9.002378 | -2.087086 | -0.460342 |
| 74 | 26 | 0 | -7.277670 | -0.003233 | 0.253973  |
| 75 | 1  | 0 | 11.143524 | 1.352568  | -1.394353 |

-----

A (PBE0/6-31G(d,p) in water solvent type I)

| Center<br>Number | Atomic<br>Number | Atomic<br>Type | Coordinates (Angstroms) |           |           |
|------------------|------------------|----------------|-------------------------|-----------|-----------|
|                  |                  |                | X                       | Y         | Z         |
| 1                | 6                | 0              | 8.406083                | -0.839218 | 0.254021  |
| 2                | 6                | 0              | 9.497508                | -1.439959 | -0.368716 |
| 3                | 6                | 0              | 8.301890                | 0.556408  | 0.278856  |
| 4                | 6                | 0              | 10.486974               | -0.647998 | -0.954646 |
| 5                | 1                | 0              | 9.575600                | -2.523494 | -0.397606 |
| 6                | 6                | 0              | 9.289097                | 1.342141  | -0.315285 |
| 7                | 1                | 0              | 7.432805                | 0.996602  | 0.754685  |
| 8                | 6                | 0              | 10.390614               | 0.734773  | -0.932789 |
| 9                | 1                | 0              | 11.338444               | -1.116365 | -1.440412 |
| 10               | 8                | 0              | 9.270991                | 2.699011  | -0.345271 |
| 11               | 6                | 0              | 8.176137                | 3.356789  | 0.262546  |
| 12               | 1                | 0              | 7.227079                | 3.083594  | -0.213837 |
| 13               | 1                | 0              | 8.116209                | 3.133241  | 1.334269  |
| 14               | 1                | 0              | 8.351259                | 4.424530  | 0.127731  |
| 15               | 6                | 0              | 7.358992                | -1.679322 | 0.948385  |
| 16               | 1                | 0              | 7.570296                | -1.683175 | 2.026245  |
| 17               | 1                | 0              | 7.452947                | -2.728925 | 0.611335  |
| 18               | 6                | 0              | 5.543349                | -1.326344 | -0.596181 |
| 19               | 6                | 0              | 5.073705                | -1.803766 | 1.693247  |
| 20               | 6                | 0              | 4.176579                | -0.684693 | -0.766525 |
| 21               | 1                | 0              | 5.480567                | -2.395164 | -0.878040 |
| 22               | 1                | 0              | 6.257516                | -0.841916 | -1.269607 |
| 23               | 6                | 0              | 3.699452                | -1.166609 | 1.565335  |
| 24               | 1                | 0              | 4.986330                | -2.890472 | 1.501708  |
| 25               | 1                | 0              | 5.438885                | -1.672092 | 2.717861  |
| 26               | 1                | 0              | 3.807853                | -0.869020 | -1.780026 |

|    |    |   |           |           |           |
|----|----|---|-----------|-----------|-----------|
| 27 | 1  | 0 | 4.282869  | 0.406845  | -0.641303 |
| 28 | 1  | 0 | 2.989578  | -1.690623 | 2.212315  |
| 29 | 1  | 0 | 3.765140  | -0.121765 | 1.914673  |
| 30 | 7  | 0 | 6.008650  | -1.171052 | 0.774985  |
| 31 | 7  | 0 | 3.248472  | -1.280105 | 0.185206  |
| 32 | 6  | 0 | 1.859047  | -1.116903 | -0.066107 |
| 33 | 6  | 0 | 1.168617  | 0.131898  | 0.058027  |
| 34 | 6  | 0 | 1.152490  | -2.241506 | -0.451688 |
| 35 | 6  | 0 | 1.803631  | 1.338690  | 0.443741  |
| 36 | 6  | 0 | -0.229301 | 0.172117  | -0.220590 |
| 37 | 6  | 0 | -0.222955 | -2.192695 | -0.723450 |
| 38 | 1  | 0 | 1.695183  | -3.176866 | -0.539338 |
| 39 | 6  | 0 | 1.096080  | 2.515845  | 0.550568  |
| 40 | 1  | 0 | 2.865269  | 1.335956  | 0.658246  |
| 41 | 6  | 0 | -0.935895 | 1.392141  | -0.104341 |
| 42 | 6  | 0 | -0.911602 | -1.002671 | -0.611200 |
| 43 | 1  | 0 | -0.761858 | -3.085331 | -1.023885 |
| 44 | 6  | 0 | -0.280855 | 2.545835  | 0.277113  |
| 45 | 1  | 0 | 1.604679  | 3.426994  | 0.848080  |
| 46 | 1  | 0 | -0.847844 | 3.467212  | 0.359344  |
| 47 | 6  | 0 | -2.357154 | -0.971179 | -0.900896 |
| 48 | 6  | 0 | -2.383624 | 1.447985  | -0.388656 |
| 49 | 8  | 0 | -2.985121 | -1.967154 | -1.233963 |
| 50 | 8  | 0 | -3.034002 | 2.479854  | -0.291926 |
| 51 | 7  | 0 | -2.996657 | 0.261490  | -0.784865 |
| 52 | 6  | 0 | -4.436149 | 0.307340  | -1.075329 |
| 53 | 1  | 0 | -4.627114 | -0.442122 | -1.843267 |
| 54 | 1  | 0 | -4.646325 | 1.299182  | -1.475368 |
| 55 | 6  | 0 | -5.271290 | 0.041725  | 0.138136  |
| 56 | 6  | 0 | -5.743998 | 1.018415  | 1.068533  |
| 57 | 6  | 0 | -5.720609 | -1.237393 | 0.590843  |
| 58 | 1  | 0 | -5.572286 | 2.084073  | 0.994969  |
| 59 | 6  | 0 | -6.491117 | 0.347202  | 2.077158  |
| 60 | 1  | 0 | -5.527633 | -2.178128 | 0.092589  |
| 61 | 6  | 0 | -6.476663 | -1.047576 | 1.781782  |
| 62 | 1  | 0 | -7.001017 | 0.815401  | 2.909007  |
| 63 | 1  | 0 | -6.973737 | -1.822726 | 2.350327  |
| 64 | 6  | 0 | -9.171087 | -0.696222 | 0.015034  |
| 65 | 6  | 0 | -8.414754 | -0.893094 | -1.176611 |
| 66 | 1  | 0 | -8.206393 | -1.844663 | -1.647905 |
| 67 | 6  | 0 | -7.957370 | 0.380844  | -1.623102 |
| 68 | 1  | 0 | -7.341153 | 0.566360  | -2.493416 |
| 69 | 6  | 0 | -9.181645 | 0.699181  | 0.304724  |
| 70 | 1  | 0 | -9.658327 | 1.168463  | 1.155376  |
| 71 | 6  | 0 | -8.431903 | 1.365038  | -0.707866 |
| 72 | 1  | 0 | -8.238930 | 2.428499  | -0.761069 |
| 73 | 1  | 0 | -9.638257 | -1.472279 | 0.607106  |
| 74 | 26 | 0 | -7.282987 | -0.002120 | 0.246790  |

75 1 0 11.148162 1.363960 -1.389773

---

A (PBE0/6-31G(d,p) in water solvent type II)

---

| Center<br>Number | Atomic<br>Number | Atomic<br>Type | Coordinates (Angstroms) |           |           |
|------------------|------------------|----------------|-------------------------|-----------|-----------|
|                  |                  |                | X                       | Y         | Z         |
| 1                | 6                | 0              | -7.821474               | -1.353943 | 0.640812  |
| 2                | 6                | 0              | -8.284671               | -1.887029 | 1.841283  |
| 3                | 6                | 0              | -8.460038               | -0.240602 | 0.082252  |
| 4                | 6                | 0              | -9.389666               | -1.315656 | 2.475453  |
| 5                | 1                | 0              | -7.784481               | -2.745502 | 2.281474  |
| 6                | 6                | 0              | -9.558182               | 0.330818  | 0.724599  |
| 7                | 1                | 0              | -8.068068               | 0.164319  | -0.843936 |
| 8                | 6                | 0              | -10.027431              | -0.213550 | 1.927494  |
| 9                | 1                | 0              | -9.751414               | -1.731222 | 3.411796  |
| 10               | 8                | 0              | -10.236961              | 1.411498  | 0.262851  |
| 11               | 6                | 0              | -9.798319               | 1.997754  | -0.947470 |
| 12               | 1                | 0              | -8.768733               | 2.366150  | -0.866742 |
| 13               | 1                | 0              | -9.861473               | 1.291246  | -1.783542 |
| 14               | 1                | 0              | -10.466552              | 2.838349  | -1.136555 |
| 15               | 6                | 0              | -6.666585               | -1.997962 | -0.091012 |
| 16               | 1                | 0              | -7.067010               | -2.629859 | -0.895172 |
| 17               | 1                | 0              | -6.131156               | -2.676877 | 0.598788  |
| 18               | 6                | 0              | -5.012177               | -0.285885 | 0.282722  |
| 19               | 6                | 0              | -4.864517               | -1.665037 | -1.653540 |
| 20               | 6                | 0              | -4.169618               | 0.799204  | -0.377815 |
| 21               | 1                | 0              | -4.349825               | -0.952909 | 0.869091  |
| 22               | 1                | 0              | -5.708824               | 0.186748  | 0.982661  |
| 23               | 6                | 0              | -4.015255               | -0.598268 | -2.333314 |
| 24               | 1                | 0              | -4.213659               | -2.410697 | -1.157711 |
| 25               | 1                | 0              | -5.451309               | -2.193760 | -2.412818 |
| 26               | 1                | 0              | -3.588523               | 1.310670  | 0.389056  |
| 27               | 1                | 0              | -4.829257               | 1.532375  | -0.859055 |
| 28               | 1                | 0              | -3.325153               | -1.039991 | -3.054301 |
| 29               | 1                | 0              | -4.687135               | 0.070329  | -2.887271 |
| 30               | 7                | 0              | -5.771417               | -1.032908 | -0.707932 |
| 31               | 7                | 0              | -3.277226               | 0.228423  | -1.388495 |
| 32               | 6                | 0              | -1.952227               | -0.028667 | -1.106251 |
| 33               | 6                | 0              | -1.111343               | 1.024878  | -0.584974 |
| 34               | 6                | 0              | -1.365036               | -1.271337 | -1.362508 |
| 35               | 6                | 0              | -1.523777               | 2.375331  | -0.520021 |
| 36               | 6                | 0              | 0.223441                | 0.716439  | -0.196750 |
| 37               | 6                | 0              | -0.042062               | -1.536353 | -1.013998 |
| 38               | 1                | 0              | -1.961505               | -2.075498 | -1.776613 |

|    |    |   |            |           |           |
|----|----|---|------------|-----------|-----------|
| 39 | 6  | 0 | -0.699974  | 3.356108  | -0.004985 |
| 40 | 1  | 0 | -2.494244  | 2.653034  | -0.916170 |
| 41 | 6  | 0 | 1.043882   | 1.730908  | 0.350905  |
| 42 | 6  | 0 | 0.750447   | -0.578948 | -0.402612 |
| 43 | 1  | 0 | 0.375140   | -2.524064 | -1.183773 |
| 44 | 6  | 0 | 0.580484   | 3.028670  | 0.459848  |
| 45 | 1  | 0 | -1.039667  | 4.386136  | 0.025341  |
| 46 | 1  | 0 | 1.236964   | 3.784327  | 0.878714  |
| 47 | 6  | 0 | 2.118236   | -0.907189 | -0.003740 |
| 48 | 6  | 0 | 2.418123   | 1.420181  | 0.788289  |
| 49 | 8  | 0 | 2.620229   | -2.014731 | -0.167072 |
| 50 | 8  | 0 | 3.152633   | 2.258415  | 1.298421  |
| 51 | 7  | 0 | 2.859940   | 0.115336  | 0.598408  |
| 52 | 6  | 0 | 4.227559   | -0.203393 | 1.025539  |
| 53 | 1  | 0 | 4.232116   | -1.255948 | 1.308128  |
| 54 | 1  | 0 | 4.438050   | 0.409713  | 1.901964  |
| 55 | 6  | 0 | 5.237508   | 0.054694  | -0.049288 |
| 56 | 6  | 0 | 5.941345   | 1.278464  | -0.271825 |
| 57 | 6  | 0 | 5.654948   | -0.870602 | -1.055433 |
| 58 | 1  | 0 | 5.844709   | 2.171193  | 0.331539  |
| 59 | 6  | 0 | 6.796574   | 1.102731  | -1.396089 |
| 60 | 1  | 0 | 5.303036   | -1.889299 | -1.149085 |
| 61 | 6  | 0 | 6.619230   | -0.226414 | -1.880895 |
| 62 | 1  | 0 | 7.478898   | 1.840271  | -1.798207 |
| 63 | 1  | 0 | 7.143751   | -0.674006 | -2.715028 |
| 64 | 6  | 0 | 8.985373   | -1.253441 | 0.081444  |
| 65 | 6  | 0 | 8.020299   | -1.902907 | 0.904625  |
| 66 | 1  | 0 | 7.656989   | -2.914806 | 0.781735  |
| 67 | 6  | 0 | 7.596915   | -0.976244 | 1.901421  |
| 68 | 1  | 0 | 6.856015   | -1.161442 | 2.668463  |
| 69 | 6  | 0 | 9.158994   | 0.074220  | 0.569734  |
| 70 | 1  | 0 | 9.812426   | 0.826616  | 0.147820  |
| 71 | 6  | 0 | 8.301206   | 0.245593  | 1.694754  |
| 72 | 1  | 0 | 8.188329   | 1.150957  | 2.276656  |
| 73 | 1  | 0 | 9.483716   | -1.685948 | -0.776258 |
| 74 | 26 | 0 | 7.228525   | -0.246902 | 0.049525  |
| 75 | 1  | 0 | -10.883364 | 0.246051  | 2.411968  |

-----

**A** ( $\omega$ B97XD/6-31G(d,p) in THF solvent)

| Center<br>Number | Atomic<br>Number | Atomic<br>Type | Coordinates (Angstroms) |           |          |
|------------------|------------------|----------------|-------------------------|-----------|----------|
|                  |                  |                | X                       | Y         | Z        |
| 1                | 6                | 0              | 8.389775                | -0.799609 | 0.268995 |

|    |   |   |           |           |           |
|----|---|---|-----------|-----------|-----------|
| 2  | 6 | 0 | 9.533010  | -1.327013 | -0.322032 |
| 3  | 6 | 0 | 8.190546  | 0.584760  | 0.286743  |
| 4  | 6 | 0 | 10.481907 | -0.470928 | -0.884113 |
| 5  | 1 | 0 | 9.684480  | -2.402170 | -0.347141 |
| 6  | 6 | 0 | 9.135603  | 1.433340  | -0.285820 |
| 7  | 1 | 0 | 7.279160  | 0.961218  | 0.735608  |
| 8  | 6 | 0 | 10.291469 | 0.901490  | -0.870996 |
| 9  | 1 | 0 | 11.374871 | -0.881484 | -1.345121 |
| 10 | 8 | 0 | 9.022090  | 2.786655  | -0.325402 |
| 11 | 6 | 0 | 7.862657  | 3.369107  | 0.238169  |
| 12 | 1 | 0 | 6.953118  | 3.021924  | -0.266214 |
| 13 | 1 | 0 | 7.783651  | 3.151755  | 1.309718  |
| 14 | 1 | 0 | 7.964346  | 4.444685  | 0.096209  |
| 15 | 6 | 0 | 7.372472  | -1.706243 | 0.930685  |
| 16 | 1 | 0 | 7.579217  | -1.737730 | 2.007644  |
| 17 | 1 | 0 | 7.503611  | -2.738645 | 0.556722  |
| 18 | 6 | 0 | 5.557770  | -1.355209 | -0.622332 |
| 19 | 6 | 0 | 5.076618  | -1.917369 | 1.651831  |
| 20 | 6 | 0 | 4.184338  | -0.720805 | -0.782408 |
| 21 | 1 | 0 | 5.510226  | -2.414898 | -0.936181 |
| 22 | 1 | 0 | 6.271082  | -0.841087 | -1.272530 |
| 23 | 6 | 0 | 3.692432  | -1.293457 | 1.535268  |
| 24 | 1 | 0 | 5.008096  | -2.996845 | 1.420615  |
| 25 | 1 | 0 | 5.432114  | -1.814686 | 2.682114  |
| 26 | 1 | 0 | 3.820715  | -0.876642 | -1.801710 |
| 27 | 1 | 0 | 4.283598  | 0.366012  | -0.622384 |
| 28 | 1 | 0 | 2.981711  | -1.852243 | 2.150221  |
| 29 | 1 | 0 | 3.741302  | -0.263579 | 1.926985  |
| 30 | 7 | 0 | 6.006485  | -1.236480 | 0.760570  |
| 31 | 7 | 0 | 3.254836  | -1.353457 | 0.145870  |
| 32 | 6 | 0 | 1.863815  | -1.178202 | -0.103801 |
| 33 | 6 | 0 | 1.184841  | 0.075682  | 0.044088  |
| 34 | 6 | 0 | 1.152629  | -2.287641 | -0.507740 |
| 35 | 6 | 0 | 1.829487  | 1.268822  | 0.463194  |
| 36 | 6 | 0 | -0.206549 | 0.134266  | -0.239704 |
| 37 | 6 | 0 | -0.224483 | -2.221262 | -0.780734 |
| 38 | 1 | 0 | 1.686847  | -3.225051 | -0.612127 |
| 39 | 6 | 0 | 1.134437  | 2.447184  | 0.590323  |
| 40 | 1 | 0 | 2.887883  | 1.251600  | 0.688910  |
| 41 | 6 | 0 | -0.902257 | 1.360224  | -0.103946 |
| 42 | 6 | 0 | -0.898690 | -1.029300 | -0.652463 |
| 43 | 1 | 0 | -0.768739 | -3.104465 | -1.095865 |
| 44 | 6 | 0 | -0.242034 | 2.496630  | 0.304949  |
| 45 | 1 | 0 | 1.647619  | 3.346005  | 0.913135  |
| 46 | 1 | 0 | -0.798707 | 3.421783  | 0.402701  |
| 47 | 6 | 0 | -2.348176 | -0.978740 | -0.944990 |
| 48 | 6 | 0 | -2.352138 | 1.435348  | -0.397507 |
| 49 | 8 | 0 | -2.985007 | -1.964179 | -1.283405 |

|    |    |   |           |           |           |
|----|----|---|-----------|-----------|-----------|
| 50 | 8  | 0 | -2.991354 | 2.469328  | -0.282173 |
| 51 | 7  | 0 | -2.973877 | 0.262670  | -0.825508 |
| 52 | 6  | 0 | -4.418187 | 0.321908  | -1.092900 |
| 53 | 1  | 0 | -4.634628 | -0.422180 | -1.857756 |
| 54 | 1  | 0 | -4.634153 | 1.315166  | -1.483630 |
| 55 | 6  | 0 | -5.224665 | 0.056678  | 0.141124  |
| 56 | 6  | 0 | -5.677709 | 1.034724  | 1.076797  |
| 57 | 6  | 0 | -5.663302 | -1.221445 | 0.601966  |
| 58 | 1  | 0 | -5.504284 | 2.098655  | 0.997349  |
| 59 | 6  | 0 | -6.409561 | 0.365689  | 2.097017  |
| 60 | 1  | 0 | -5.477106 | -2.161005 | 0.100981  |
| 61 | 6  | 0 | -6.400605 | -1.029143 | 1.803404  |
| 62 | 1  | 0 | -6.904035 | 0.834612  | 2.936304  |
| 63 | 1  | 0 | -6.887204 | -1.802620 | 2.381146  |
| 64 | 6  | 0 | -9.139511 | -0.665993 | 0.043560  |
| 65 | 6  | 0 | -8.387942 | -0.874205 | -1.148723 |
| 66 | 1  | 0 | -8.186401 | -1.828630 | -1.614702 |
| 67 | 6  | 0 | -7.924046 | 0.393853  | -1.603372 |
| 68 | 1  | 0 | -7.308838 | 0.570408  | -2.475014 |
| 69 | 6  | 0 | -9.140867 | 0.730482  | 0.325235  |
| 70 | 1  | 0 | -9.612860 | 1.207322  | 1.172909  |
| 71 | 6  | 0 | -8.389480 | 1.385723  | -0.692604 |
| 72 | 1  | 0 | -8.189535 | 2.446477  | -0.752013 |
| 73 | 1  | 0 | -9.610716 | -1.435023 | 0.639636  |
| 74 | 26 | 0 | -7.237365 | 0.016278  | 0.270511  |
| 75 | 1  | 0 | 11.015492 | 1.578498  | -1.311474 |

-----

**A** (TPSSh/6-31G(d,p) in THF solvent)

| Center<br>Number | Atomic<br>Number | Atomic<br>Type | Coordinates (Angstroms) |           |           |
|------------------|------------------|----------------|-------------------------|-----------|-----------|
|                  |                  |                | X                       | Y         | Z         |
| 1                | 6                | 0              | 8.434958                | -0.836272 | 0.269300  |
| 2                | 6                | 0              | 9.513208                | -1.444573 | -0.379711 |
| 3                | 6                | 0              | 8.339301                | 0.564815  | 0.299228  |
| 4                | 6                | 0              | 10.498363               | -0.655186 | -0.987674 |
| 5                | 1                | 0              | 9.584580                | -2.528405 | -0.411368 |
| 6                | 6                | 0              | 9.323094                | 1.346361  | -0.316676 |
| 7                | 1                | 0              | 7.483353                | 1.011115  | 0.792691  |
| 8                | 6                | 0              | 10.411328               | 0.732969  | -0.961181 |
| 9                | 1                | 0              | 11.336207               | -1.127924 | -1.492123 |
| 10               | 8                | 0              | 9.315135                | 2.714816  | -0.344732 |
| 11               | 6                | 0              | 8.226164                | 3.380523  | 0.297024  |
| 12               | 1                | 0              | 7.268706                | 3.109788  | -0.162883 |

|    |   |   |           |           |           |
|----|---|---|-----------|-----------|-----------|
| 13 | 1 | 0 | 8.194144  | 3.148479  | 1.367774  |
| 14 | 1 | 0 | 8.410335  | 4.445697  | 0.158706  |
| 15 | 6 | 0 | 7.390691  | -1.673729 | 0.985475  |
| 16 | 1 | 0 | 7.593494  | -1.652109 | 2.064414  |
| 17 | 1 | 0 | 7.487201  | -2.728409 | 0.666957  |
| 18 | 6 | 0 | 5.566801  | -1.350598 | -0.584517 |
| 19 | 6 | 0 | 5.085415  | -1.799251 | 1.725480  |
| 20 | 6 | 0 | 4.194380  | -0.707639 | -0.768868 |
| 21 | 1 | 0 | 5.503962  | -2.423886 | -0.846021 |
| 22 | 1 | 0 | 6.286541  | -0.875498 | -1.258192 |
| 23 | 6 | 0 | 3.705972  | -1.158405 | 1.583824  |
| 24 | 1 | 0 | 4.999216  | -2.886920 | 1.542859  |
| 25 | 1 | 0 | 5.451060  | -1.653065 | 2.747830  |
| 26 | 1 | 0 | 3.825407  | -0.904994 | -1.779335 |
| 27 | 1 | 0 | 4.295369  | 0.384628  | -0.649350 |
| 28 | 1 | 0 | 2.990596  | -1.669716 | 2.234145  |
| 29 | 1 | 0 | 3.772379  | -0.106129 | 1.908367  |
| 30 | 7 | 0 | 6.027797  | -1.165100 | 0.797006  |
| 31 | 7 | 0 | 3.257693  | -1.305421 | 0.192678  |
| 32 | 6 | 0 | 1.860362  | -1.131217 | -0.066273 |
| 33 | 6 | 0 | 1.170997  | 0.124050  | 0.049392  |
| 34 | 6 | 0 | 1.150926  | -2.260851 | -0.452297 |
| 35 | 6 | 0 | 1.809068  | 1.335862  | 0.429622  |
| 36 | 6 | 0 | -0.233105 | 0.165507  | -0.235617 |
| 37 | 6 | 0 | -0.227050 | -2.210987 | -0.731003 |
| 38 | 1 | 0 | 1.692624  | -3.197177 | -0.532857 |
| 39 | 6 | 0 | 1.100585  | 2.519969  | 0.527624  |
| 40 | 1 | 0 | 2.870318  | 1.331227  | 0.645429  |
| 41 | 6 | 0 | -0.939238 | 1.392514  | -0.127685 |
| 42 | 6 | 0 | -0.917983 | -1.014302 | -0.625122 |
| 43 | 1 | 0 | -0.766845 | -3.103226 | -1.029871 |
| 44 | 6 | 0 | -0.279366 | 2.551947  | 0.250357  |
| 45 | 1 | 0 | 1.610612  | 3.431760  | 0.820262  |
| 46 | 1 | 0 | -0.845402 | 3.474103  | 0.325437  |
| 47 | 6 | 0 | -2.365850 | -0.983320 | -0.920950 |
| 48 | 6 | 0 | -2.389291 | 1.452324  | -0.417446 |
| 49 | 8 | 0 | -2.999595 | -1.984815 | -1.257707 |
| 50 | 8 | 0 | -3.042634 | 2.493357  | -0.331853 |
| 51 | 7 | 0 | -3.007829 | 0.257625  | -0.808115 |
| 52 | 6 | 0 | -4.461217 | 0.305646  | -1.103636 |
| 53 | 1 | 0 | -4.645765 | -0.455017 | -1.861300 |
| 54 | 1 | 0 | -4.660109 | 1.296647  | -1.510235 |
| 55 | 6 | 0 | -5.296673 | 0.053621  | 0.119980  |
| 56 | 6 | 0 | -5.766304 | 1.045696  | 1.046556  |
| 57 | 6 | 0 | -5.741338 | -1.226933 | 0.595270  |
| 58 | 1 | 0 | -5.593562 | 2.109835  | 0.961544  |
| 59 | 6 | 0 | -6.506416 | 0.382433  | 2.074480  |
| 60 | 1 | 0 | -5.546647 | -2.174115 | 0.111149  |

|    |    |   |           |           |           |
|----|----|---|-----------|-----------|-----------|
| 61 | 6  | 0 | -6.490917 | -1.022424 | 1.795598  |
| 62 | 1  | 0 | -7.006404 | 0.859508  | 2.906928  |
| 63 | 1  | 0 | -6.977320 | -1.791777 | 2.380456  |
| 64 | 6  | 0 | -9.185276 | -0.711142 | 0.055892  |
| 65 | 6  | 0 | -8.437790 | -0.909108 | -1.148955 |
| 66 | 1  | 0 | -8.230941 | -1.860666 | -1.620145 |
| 67 | 6  | 0 | -7.994887 | 0.372134  | -1.609638 |
| 68 | 1  | 0 | -7.395497 | 0.558509  | -2.490959 |
| 69 | 6  | 0 | -9.204281 | 0.692132  | 0.339573  |
| 70 | 1  | 0 | -9.678906 | 1.162434  | 1.190398  |
| 71 | 6  | 0 | -8.468599 | 1.361872  | -0.689881 |
| 72 | 1  | 0 | -8.289213 | 2.426777  | -0.753621 |
| 73 | 1  | 0 | -9.642993 | -1.487192 | 0.654714  |
| 74 | 26 | 0 | -7.304707 | 0.004392  | 0.255718  |
| 75 | 1  | 0 | 11.162833 | 1.358313  | -1.432384 |

---

A (PBE0/6-31G(d,p) in water solvent)

| Center<br>Number | Atomic<br>Number | Atomic<br>Type | Coordinates (Angstroms) |           |           |
|------------------|------------------|----------------|-------------------------|-----------|-----------|
|                  |                  |                | X                       | Y         | Z         |
| 1                | 6                | 0              | 8.401527                | -0.840209 | 0.262020  |
| 2                | 6                | 0              | 9.487885                | -1.445114 | -0.364650 |
| 3                | 6                | 0              | 8.302135                | 0.555708  | 0.286059  |
| 4                | 6                | 0              | 10.477559               | -0.657104 | -0.955352 |
| 5                | 1                | 0              | 9.562027                | -2.528957 | -0.392896 |
| 6                | 6                | 0              | 9.289572                | 1.337249  | -0.312554 |
| 7                | 1                | 0              | 7.436061                | 0.998819  | 0.764681  |
| 8                | 6                | 0              | 10.386198               | 0.725652  | -0.934148 |
| 9                | 1                | 0              | 11.325315               | -1.128886 | -1.444274 |
| 10               | 8                | 0              | 9.276431                | 2.694166  | -0.343626 |
| 11               | 6                | 0              | 8.188296                | 3.355586  | 0.269127  |
| 12               | 1                | 0              | 7.235335                | 3.086202  | -0.202239 |
| 13               | 1                | 0              | 8.132505                | 3.132603  | 1.341451  |
| 14               | 1                | 0              | 8.366666                | 4.422759  | 0.133337  |
| 15               | 6                | 0              | 7.353638                | -1.675089 | 0.961019  |
| 16               | 1                | 0              | 7.563029                | -1.671339 | 2.039306  |
| 17               | 1                | 0              | 7.447591                | -2.727239 | 0.631396  |
| 18               | 6                | 0              | 5.542838                | -1.327038 | -0.590193 |
| 19               | 6                | 0              | 5.065964                | -1.796811 | 1.699080  |

|    |   |   |           |           |           |
|----|---|---|-----------|-----------|-----------|
| 20 | 6 | 0 | 4.176927  | -0.685251 | -0.766579 |
| 21 | 1 | 0 | 5.479645  | -2.396702 | -0.868821 |
| 22 | 1 | 0 | 6.260079  | -0.845474 | -1.262388 |
| 23 | 6 | 0 | 3.692403  | -1.159264 | 1.565056  |
| 24 | 1 | 0 | 4.978065  | -2.884132 | 1.510946  |
| 25 | 1 | 0 | 5.428395  | -1.661846 | 2.724393  |
| 26 | 1 | 0 | 3.810483  | -0.873098 | -1.780308 |
| 27 | 1 | 0 | 4.283959  | 0.406904  | -0.645564 |
| 28 | 1 | 0 | 2.979750  | -1.681034 | 2.210889  |
| 29 | 1 | 0 | 3.758021  | -0.113668 | 1.912656  |
| 30 | 7 | 0 | 6.003752  | -1.167646 | 0.781854  |
| 31 | 7 | 0 | 3.245599  | -1.275641 | 0.184424  |
| 32 | 6 | 0 | 1.856806  | -1.113403 | -0.071735 |
| 33 | 6 | 0 | 1.165742  | 0.135047  | 0.050091  |
| 34 | 6 | 0 | 1.151952  | -2.238283 | -0.459003 |
| 35 | 6 | 0 | 1.799269  | 1.342660  | 0.435525  |
| 36 | 6 | 0 | -0.231701 | 0.174174  | -0.230803 |
| 37 | 6 | 0 | -0.223108 | -2.190433 | -0.733803 |
| 38 | 1 | 0 | 1.696378  | -3.172901 | -0.544393 |
| 39 | 6 | 0 | 1.090504  | 2.519101  | 0.540580  |
| 40 | 1 | 0 | 2.860817  | 1.339957  | 0.650903  |
| 41 | 6 | 0 | -0.939407 | 1.393567  | -0.115789 |
| 42 | 6 | 0 | -0.912509 | -1.001077 | -0.622438 |
| 43 | 1 | 0 | -0.762409 | -3.082607 | -1.035058 |
| 44 | 6 | 0 | -0.286305 | 2.547857  | 0.265807  |
| 45 | 1 | 0 | 1.597851  | 3.431074  | 0.838119  |
| 46 | 1 | 0 | -0.856047 | 3.467652  | 0.346938  |
| 47 | 6 | 0 | -2.358567 | -0.971308 | -0.913441 |
| 48 | 6 | 0 | -2.387654 | 1.448617  | -0.400920 |
| 49 | 8 | 0 | -2.984197 | -1.967461 | -1.247843 |
| 50 | 8 | 0 | -3.037690 | 2.480042  | -0.305300 |
| 51 | 7 | 0 | -2.999017 | 0.261113  | -0.796931 |
| 52 | 6 | 0 | -4.440063 | 0.304003  | -1.078443 |
| 53 | 1 | 0 | -4.634894 | -0.448650 | -1.842430 |
| 54 | 1 | 0 | -4.654612 | 1.295020  | -1.478638 |
| 55 | 6 | 0 | -5.264049 | 0.039637  | 0.142332  |
| 56 | 6 | 0 | -5.734345 | 1.017598  | 1.071237  |
| 57 | 6 | 0 | -5.712697 | -1.238040 | 0.596973  |
| 58 | 1 | 0 | -5.565783 | 2.083406  | 0.992316  |
| 59 | 6 | 0 | -6.478141 | 0.348202  | 2.082502  |
| 60 | 1 | 0 | -5.525060 | -2.178629 | 0.096345  |
| 61 | 6 | 0 | -6.464700 | -1.046360 | 1.789322  |
| 62 | 1 | 0 | -6.989467 | 0.818156  | 2.912508  |
| 63 | 1 | 0 | -6.963724 | -1.820215 | 2.357952  |
| 64 | 6 | 0 | -8.836747 | -1.021212 | -0.547049 |
| 65 | 6 | 0 | -8.083934 | -0.371644 | -1.567072 |
| 66 | 1 | 0 | -7.579636 | -0.857643 | -2.392147 |
| 67 | 6 | 0 | -8.085065 | 1.026549  | -1.291882 |

|    |    |   |           |           |           |
|----|----|---|-----------|-----------|-----------|
| 68 | 1  | 0 | -7.581789 | 1.789666  | -1.871239 |
| 69 | 6  | 0 | -9.303041 | -0.025334 | 0.357955  |
| 70 | 1  | 0 | -9.885612 | -0.201940 | 1.252677  |
| 71 | 6  | 0 | -8.838491 | 1.239987  | -0.101925 |
| 72 | 1  | 0 | -9.005510 | 2.193237  | 0.382260  |
| 73 | 1  | 0 | -9.002378 | -2.087086 | -0.460342 |
| 74 | 26 | 0 | -7.277670 | -0.003233 | 0.253973  |
| 75 | 1  | 0 | 11.143524 | 1.352568  | -1.394353 |

-----

**A-W<sub>d</sub>-m<sub>1</sub>** (PBE0/6-31G(d,p) in water solvent)

| Center<br>Number | Atomic<br>Number | Atomic<br>Type | Coordinates (Angstroms) |           |           |
|------------------|------------------|----------------|-------------------------|-----------|-----------|
|                  |                  |                | X                       | Y         | Z         |
| 1                | 6                | 0              | 8.183753                | -0.815201 | 0.227428  |
| 2                | 6                | 0              | 9.078928                | -1.512037 | -0.580733 |
| 3                | 6                | 0              | 8.221057                | 0.584254  | 0.258978  |
| 4                | 6                | 0              | 10.008331               | -0.812622 | -1.354220 |
| 5                | 1                | 0              | 9.050441                | -2.597792 | -0.609100 |
| 6                | 6                | 0              | 9.140839                | 1.277335  | -0.526633 |
| 7                | 1                | 0              | 7.506213                | 1.118275  | 0.874631  |
| 8                | 6                | 0              | 10.044243               | 0.572688  | -1.334038 |
| 9                | 1                | 0              | 10.707261               | -1.356262 | -1.983529 |
| 10               | 8                | 0              | 9.232427                | 2.629649  | -0.573891 |
| 11               | 6                | 0              | 8.363978                | 3.375687  | 0.260537  |
| 12               | 1                | 0              | 7.310574                | 3.149974  | 0.059452  |
| 13               | 1                | 0              | 8.569549                | 3.183043  | 1.320608  |
| 14               | 1                | 0              | 8.562226                | 4.425176  | 0.040956  |
| 15               | 6                | 0              | 7.187150                | -1.553718 | 1.087305  |
| 16               | 1                | 0              | 7.395087                | -1.349789 | 2.145012  |
| 17               | 1                | 0              | 7.312897                | -2.640310 | 0.940737  |
| 18               | 6                | 0              | 5.369496                | -1.507390 | -0.514517 |
| 19               | 6                | 0              | 4.902502                | -1.802845 | 1.800064  |
| 20               | 6                | 0              | 3.963914                | -0.993582 | -0.770717 |
| 21               | 1                | 0              | 5.399317                | -2.602657 | -0.655781 |
| 22               | 1                | 0              | 6.057838                | -1.053669 | -1.233316 |
| 23               | 6                | 0              | 3.480507                | -1.301436 | 1.617086  |
| 24               | 1                | 0              | 4.929690                | -2.900245 | 1.678694  |
| 25               | 1                | 0              | 5.240293                | -1.566296 | 2.814494  |
| 26               | 1                | 0              | 3.627579                | -1.343655 | -1.751862 |
| 27               | 1                | 0              | 3.989655                | 0.106414  | -0.802657 |
| 28               | 1                | 0              | 2.813686                | -1.862829 | 2.279199  |
| 29               | 1                | 0              | 3.438415                | -0.245029 | 1.922820  |
| 30               | 7                | 0              | 5.798288                | -1.156404 | 0.840047  |

|    |    |   |           |           |           |
|----|----|---|-----------|-----------|-----------|
| 31 | 7  | 0 | 3.052779  | -1.523752 | 0.239729  |
| 32 | 6  | 0 | 1.666055  | -1.331700 | -0.016310 |
| 33 | 6  | 0 | 1.020391  | -0.052253 | 0.024660  |
| 34 | 6  | 0 | 0.922510  | -2.457159 | -0.319308 |
| 35 | 6  | 0 | 1.695827  | 1.160292  | 0.322581  |
| 36 | 6  | 0 | -0.378279 | 0.010802  | -0.251125 |
| 37 | 6  | 0 | -0.451776 | -2.383243 | -0.588686 |
| 38 | 1  | 0 | 1.435278  | -3.413016 | -0.343537 |
| 39 | 6  | 0 | 1.018501  | 2.360464  | 0.347733  |
| 40 | 1  | 0 | 2.760881  | 1.160695  | 0.534836  |
| 41 | 6  | 0 | -1.048918 | 1.256375  | -0.218344 |
| 42 | 6  | 0 | -1.100042 | -1.166167 | -0.556815 |
| 43 | 1  | 0 | -1.021299 | -3.276186 | -0.824734 |
| 44 | 6  | 0 | -0.358059 | 2.413810  | 0.078643  |
| 45 | 1  | 0 | 1.555372  | 3.275168  | 0.577987  |
| 46 | 1  | 0 | -0.897105 | 3.355275  | 0.097802  |
| 47 | 6  | 0 | -2.545254 | -1.110214 | -0.844833 |
| 48 | 6  | 0 | -2.495326 | 1.337271  | -0.501573 |
| 49 | 8  | 0 | -3.204728 | -2.107272 | -1.106807 |
| 50 | 8  | 0 | -3.113618 | 2.393021  | -0.474835 |
| 51 | 7  | 0 | -3.146596 | 0.146097  | -0.813564 |
| 52 | 6  | 0 | -4.584418 | 0.216345  | -1.106361 |
| 53 | 1  | 0 | -4.799993 | -0.577485 | -1.821430 |
| 54 | 1  | 0 | -4.764479 | 1.184679  | -1.573128 |
| 55 | 6  | 0 | -5.425914 | 0.060004  | 0.121715  |
| 56 | 6  | 0 | -5.861891 | 1.111395  | 0.986285  |
| 57 | 6  | 0 | -5.920633 | -1.169898 | 0.656056  |
| 58 | 1  | 0 | -5.651983 | 2.163086  | 0.843818  |
| 59 | 6  | 0 | -6.631650 | 0.534615  | 2.035469  |
| 60 | 1  | 0 | -5.762891 | -2.147473 | 0.220286  |
| 61 | 6  | 0 | -6.668050 | -0.876011 | 1.831264  |
| 62 | 1  | 0 | -7.123256 | 1.074050  | 2.834539  |
| 63 | 1  | 0 | -7.192044 | -1.594151 | 2.448423  |
| 64 | 6  | 0 | -9.351770 | -0.538735 | 0.045615  |
| 65 | 6  | 0 | -8.605530 | -0.846575 | -1.128723 |
| 66 | 1  | 0 | -8.434707 | -1.835779 | -1.532854 |
| 67 | 6  | 0 | -8.099843 | 0.374814  | -1.661643 |
| 68 | 1  | 0 | -7.478199 | 0.475626  | -2.541982 |
| 69 | 6  | 0 | -9.307978 | 0.872717  | 0.238145  |
| 70 | 1  | 0 | -9.764889 | 1.417762  | 1.053754  |
| 71 | 6  | 0 | -8.534553 | 1.437541  | -0.817136 |
| 72 | 1  | 0 | -8.300608 | 2.486503  | -0.943483 |
| 73 | 1  | 0 | -9.847804 | -1.253280 | 0.689386  |
| 74 | 26 | 0 | -7.437839 | 0.096129  | 0.230868  |
| 75 | 1  | 0 | 10.756245 | 1.130520  | -1.934446 |
| 76 | 8  | 0 | 5.111504  | 1.621535  | 1.056333  |
| 77 | 1  | 0 | 5.405795  | 0.681000  | 1.016711  |
| 78 | 1  | 0 | 5.074204  | 1.818504  | 1.998152  |

-----

**A-Wa-m2** (PBE0/6-31G(d,p) in water solvent)

| Center<br>Number | Atomic<br>Number | Atomic<br>Type | Coordinates (Angstroms) |           |           |
|------------------|------------------|----------------|-------------------------|-----------|-----------|
|                  |                  |                | X                       | Y         | Z         |
| 1                | 6                | 0              | 7.118437                | -2.053069 | 0.686150  |
| 2                | 6                | 0              | 7.427951                | -3.377759 | 0.388007  |
| 3                | 6                | 0              | 8.066368                | -1.048833 | 0.457183  |
| 4                | 6                | 0              | 8.685708                | -3.699114 | -0.126313 |
| 5                | 1                | 0              | 6.689963                | -4.157507 | 0.556078  |
| 6                | 6                | 0              | 9.317886                | -1.374941 | -0.064622 |
| 7                | 1                | 0              | 7.792604                | -0.024158 | 0.682255  |
| 8                | 6                | 0              | 9.629764                | -2.710038 | -0.354357 |
| 9                | 1                | 0              | 8.927883                | -4.732383 | -0.358682 |
| 10               | 8                | 0              | 10.296926               | -0.471745 | -0.324151 |
| 11               | 6                | 0              | 10.026810               | 0.889713  | -0.050954 |
| 12               | 1                | 0              | 9.182640                | 1.259850  | -0.644777 |
| 13               | 1                | 0              | 9.815676                | 1.053025  | 1.012460  |
| 14               | 1                | 0              | 10.927735               | 1.438541  | -0.326603 |
| 15               | 6                | 0              | 5.786009                | -1.695354 | 1.302961  |
| 16               | 1                | 0              | 5.921270                | -1.566847 | 2.385219  |
| 17               | 1                | 0              | 5.086405                | -2.542701 | 1.176074  |
| 18               | 6                | 0              | 4.811098                | -0.582832 | -0.598760 |
| 19               | 6                | 0              | 4.123727                | 0.023751  | 1.594777  |
| 20               | 6                | 0              | 4.318984                | 0.761362  | -1.120756 |
| 21               | 1                | 0              | 4.027121                | -1.356840 | -0.700927 |
| 22               | 1                | 0              | 5.664726                | -0.901946 | -1.205249 |
| 23               | 6                | 0              | 3.662306                | 1.391059  | 1.111840  |
| 24               | 1                | 0              | 3.269202                | -0.680823 | 1.578441  |
| 25               | 1                | 0              | 4.452121                | 0.115520  | 2.636017  |
| 26               | 1                | 0              | 3.979999                | 0.683879  | -2.156018 |
| 27               | 1                | 0              | 5.161794                | 1.463328  | -1.104232 |
| 28               | 1                | 0              | 2.828820                | 1.732412  | 1.725482  |
| 29               | 1                | 0              | 4.481776                | 2.111323  | 1.215048  |
| 30               | 7                | 0              | 5.234386                | -0.453161 | 0.787393  |
| 31               | 7                | 0              | 3.259461                | 1.368041  | -0.308030 |
| 32               | 6                | 0              | 1.920676                | 1.077654  | -0.599883 |
| 33               | 6                | 0              | 0.889058                | 1.951061  | -0.098012 |
| 34               | 6                | 0              | 1.547476                | 0.005016  | -1.403183 |
| 35               | 6                | 0              | 1.160406                | 3.182388  | 0.546493  |
| 36               | 6                | 0              | -0.473764               | 1.597581  | -0.312250 |
| 37               | 6                | 0              | 0.203268                | -0.296606 | -1.640298 |
| 38               | 1                | 0              | 2.301328                | -0.651085 | -1.819539 |

|    |    |   |           |           |           |
|----|----|---|-----------|-----------|-----------|
| 39 | 6  | 0 | 0.141255  | 3.975251  | 1.032407  |
| 40 | 1  | 0 | 2.183126  | 3.539217  | 0.613799  |
| 41 | 6  | 0 | -1.501783 | 2.415874  | 0.212074  |
| 42 | 6  | 0 | -0.808243 | 0.459072  | -1.080730 |
| 43 | 1  | 0 | -0.061329 | -1.159446 | -2.243067 |
| 44 | 6  | 0 | -1.195954 | 3.579176  | 0.891178  |
| 45 | 1  | 0 | 0.376011  | 4.918845  | 1.514008  |
| 46 | 1  | 0 | -2.006426 | 4.187106  | 1.279465  |
| 47 | 6  | 0 | -2.208746 | 0.084806  | -1.306121 |
| 48 | 6  | 0 | -2.918558 | 2.046307  | 0.024461  |
| 49 | 8  | 0 | -2.540242 | -0.896267 | -1.961263 |
| 50 | 8  | 0 | -3.837215 | 2.701739  | 0.500245  |
| 51 | 7  | 0 | -3.180126 | 0.909552  | -0.734198 |
| 52 | 6  | 0 | -4.586682 | 0.539820  | -0.936929 |
| 53 | 1  | 0 | -4.648625 | 0.056244  | -1.911712 |
| 54 | 1  | 0 | -5.158987 | 1.467296  | -0.953603 |
| 55 | 6  | 0 | -5.096049 | -0.373034 | 0.134600  |
| 56 | 6  | 0 | -5.695904 | 0.024580  | 1.369469  |
| 57 | 6  | 0 | -5.047448 | -1.801342 | 0.119980  |
| 58 | 1  | 0 | -5.878522 | 1.046743  | 1.673299  |
| 59 | 6  | 0 | -6.027644 | -1.150083 | 2.101915  |
| 60 | 1  | 0 | -4.652804 | -2.403261 | -0.687753 |
| 61 | 6  | 0 | -5.626781 | -2.279264 | 1.329115  |
| 62 | 1  | 0 | -6.519397 | -1.181616 | 3.065451  |
| 63 | 1  | 0 | -5.761163 | -3.317436 | 1.603595  |
| 64 | 6  | 0 | -7.958049 | -1.856134 | -1.306206 |
| 65 | 6  | 0 | -7.999469 | -0.431715 | -1.278013 |
| 66 | 1  | 0 | -7.618436 | 0.230946  | -2.044344 |
| 67 | 6  | 0 | -8.606615 | -0.032735 | -0.051769 |
| 68 | 1  | 0 | -8.767088 | 0.985808  | 0.276654  |
| 69 | 6  | 0 | -8.538486 | -2.337329 | -0.096928 |
| 70 | 1  | 0 | -8.639240 | -3.375624 | 0.190943  |
| 71 | 6  | 0 | -8.939303 | -1.210537 | 0.678233  |
| 72 | 1  | 0 | -9.397964 | -1.243182 | 1.657845  |
| 73 | 1  | 0 | -7.540260 | -2.464643 | -2.097541 |
| 74 | 26 | 0 | -6.950904 | -1.144411 | 0.300079  |
| 75 | 8  | 0 | 4.239817  | 4.085270  | -0.616844 |
| 76 | 1  | 0 | 3.788434  | 4.654005  | -1.248707 |
| 77 | 1  | 0 | 3.789128  | 3.227528  | -0.709979 |
| 78 | 1  | 0 | 10.609396 | -2.942963 | -0.760099 |

-----

**A-Wu-m<sub>3</sub>** (PBE0/6-31G(d,p) in water solvent)

-----

| Center | Atomic | Atomic | Coordinates (Angstroms) |
|--------|--------|--------|-------------------------|
|--------|--------|--------|-------------------------|

| Number | Number | Type | X         | Y         | Z         |
|--------|--------|------|-----------|-----------|-----------|
| 1      | 6      | 0    | 7.456882  | -1.604522 | 0.673170  |
| 2      | 6      | 0    | 7.860524  | -2.920364 | 0.460231  |
| 3      | 6      | 0    | 8.303363  | -0.550213 | 0.310870  |
| 4      | 6      | 0    | 9.111445  | -3.181751 | -0.102307 |
| 5      | 1      | 0    | 7.200673  | -3.739878 | 0.732071  |
| 6      | 6      | 0    | 9.548438  | -0.817411 | -0.258006 |
| 7      | 1      | 0    | 7.956238  | 0.464410  | 0.471527  |
| 8      | 6      | 0    | 9.955447  | -2.142621 | -0.462309 |
| 9      | 1      | 0    | 9.426850  | -4.208016 | -0.268358 |
| 10     | 8      | 0    | 10.433184 | 0.136542  | -0.644096 |
| 11     | 6      | 0    | 10.065527 | 1.489917  | -0.459789 |
| 12     | 1      | 0    | 9.162983  | 1.743245  | -1.028536 |
| 13     | 1      | 0    | 9.898660  | 1.721567  | 0.598818  |
| 14     | 1      | 0    | 10.901522 | 2.084131  | -0.829814 |
| 15     | 6      | 0    | 6.133547  | -1.304612 | 1.338475  |
| 16     | 1      | 0    | 6.314900  | -1.076908 | 2.397488  |
| 17     | 1      | 0    | 5.502419  | -2.213079 | 1.320677  |
| 18     | 6      | 0    | 4.972453  | -0.432949 | -0.584545 |
| 19     | 6      | 0    | 4.347340  | 0.289608  | 1.597199  |
| 20     | 6      | 0    | 4.343168  | 0.824172  | -1.169897 |
| 21     | 1      | 0    | 4.241127  | -1.264467 | -0.585879 |
| 22     | 1      | 0    | 5.817223  | -0.736683 | -1.210907 |
| 23     | 6      | 0    | 3.727243  | 1.565757  | 1.037670  |
| 24     | 1      | 0    | 3.558338  | -0.481299 | 1.685086  |
| 25     | 1      | 0    | 4.726118  | 0.498797  | 2.604121  |
| 26     | 1      | 0    | 3.973899  | 0.650468  | -2.182023 |
| 27     | 1      | 0    | 5.119084  | 1.598293  | -1.231928 |
| 28     | 1      | 0    | 2.888666  | 1.856410  | 1.669654  |
| 29     | 1      | 0    | 4.469234  | 2.373934  | 1.050635  |
| 30     | 7      | 0    | 5.452379  | -0.157396 | 0.761539  |
| 31     | 7      | 0    | 3.273302  | 1.362392  | -0.340271 |
| 32     | 6      | 0    | 1.952742  | 1.103067  | -0.627344 |
| 33     | 6      | 0    | 0.919510  | 1.989480  | -0.140439 |
| 34     | 6      | 0    | 1.564789  | 0.025369  | -1.434815 |
| 35     | 6      | 0    | 1.201019  | 3.234806  | 0.466440  |
| 36     | 6      | 0    | -0.445565 | 1.647559  | -0.357619 |
| 37     | 6      | 0    | 0.219204  | -0.263371 | -1.668779 |
| 38     | 1      | 0    | 2.315364  | -0.637332 | -1.849795 |
| 39     | 6      | 0    | 0.191606  | 4.053946  | 0.930394  |
| 40     | 1      | 0    | 2.229510  | 3.570711  | 0.536499  |
| 41     | 6      | 0    | -1.465091 | 2.488484  | 0.147344  |
| 42     | 6      | 0    | -0.790821 | 0.504145  | -1.114311 |
| 43     | 1      | 0    | -0.052679 | -1.127979 | -2.266282 |
| 44     | 6      | 0    | -1.148094 | 3.665829  | 0.798231  |
| 45     | 1      | 0    | 0.436202  | 5.008057  | 1.385384  |
| 46     | 1      | 0    | -1.953729 | 4.290800  | 1.169313  |

|    |    |   |           |           |           |
|----|----|---|-----------|-----------|-----------|
| 47 | 6  | 0 | -2.190464 | 0.142756  | -1.339828 |
| 48 | 6  | 0 | -2.884809 | 2.131167  | -0.038078 |
| 49 | 8  | 0 | -2.534356 | -0.842150 | -1.984733 |
| 50 | 8  | 0 | -3.798065 | 2.804589  | 0.424515  |
| 51 | 7  | 0 | -3.155427 | 0.986386  | -0.780013 |
| 52 | 6  | 0 | -4.564871 | 0.630456  | -0.984119 |
| 53 | 1  | 0 | -4.628360 | 0.135036  | -1.952848 |
| 54 | 1  | 0 | -5.126497 | 1.564116  | -1.014760 |
| 55 | 6  | 0 | -5.089831 | -0.262985 | 0.096251  |
| 56 | 6  | 0 | -5.690803 | 0.156393  | 1.323304  |
| 57 | 6  | 0 | -5.058115 | -1.691749 | 0.098900  |
| 58 | 1  | 0 | -5.862533 | 1.184231  | 1.614092  |
| 59 | 6  | 0 | -6.040064 | -1.005438 | 2.068038  |
| 60 | 1  | 0 | -4.666360 | -2.307584 | -0.699706 |
| 61 | 6  | 0 | -5.648936 | -2.148417 | 1.310685  |
| 62 | 1  | 0 | -6.536730 | -1.019771 | 3.029467  |
| 63 | 1  | 0 | -5.796838 | -3.181595 | 1.596826  |
| 64 | 6  | 0 | -7.952223 | -1.695727 | -1.361655 |
| 65 | 6  | 0 | -7.998344 | -0.272167 | -1.307641 |
| 66 | 1  | 0 | -7.615708 | 0.405550  | -2.059884 |
| 67 | 6  | 0 | -8.612416 | 0.102377  | -0.077166 |
| 68 | 1  | 0 | -8.777619 | 1.114267  | 0.269014  |
| 69 | 6  | 0 | -8.536639 | -2.200762 | -0.164038 |
| 70 | 1  | 0 | -8.635307 | -3.244443 | 0.104430  |
| 71 | 6  | 0 | -8.944664 | -1.089565 | 0.629673  |
| 72 | 1  | 0 | -9.407632 | -1.141403 | 1.606430  |
| 73 | 1  | 0 | -7.528883 | -2.288385 | -2.162019 |
| 74 | 26 | 0 | -6.954674 | -1.010485 | 0.261835  |
| 75 | 8  | 0 | 1.519566  | -1.978395 | 1.303274  |
| 76 | 1  | 0 | 1.361294  | -1.429325 | 0.525398  |
| 77 | 1  | 0 | 2.152498  | -2.632247 | 0.989223  |
| 78 | 1  | 0 | 10.928176 | -2.329354 | -0.906712 |

-----

**A-W<sub>u</sub>-m<sub>4</sub>** (PBE0/6-31G(d,p) in water solvent)

| Center<br>Number | Atomic<br>Number | Atomic<br>Type | Coordinates (Angstroms) |           |           |
|------------------|------------------|----------------|-------------------------|-----------|-----------|
|                  |                  |                | X                       | Y         | Z         |
| 1                | 6                | 0              | 8.404836                | -0.841520 | 0.253846  |
| 2                | 6                | 0              | 9.494786                | -1.442453 | -0.371247 |
| 3                | 6                | 0              | 8.302852                | 0.554214  | 0.282172  |
| 4                | 6                | 0              | 10.485027               | -0.650609 | -0.956060 |
| 5                | 1                | 0              | 9.571160                | -2.526035 | -0.402806 |
| 6                | 6                | 0              | 9.290868                | 1.339847  | -0.310716 |

|    |   |   |           |           |           |
|----|---|---|-----------|-----------|-----------|
| 7  | 1 | 0 | 7.434811  | 0.994623  | 0.759701  |
| 8  | 6 | 0 | 10.390909 | 0.732245  | -0.930644 |
| 9  | 1 | 0 | 11.335353 | -1.119123 | -1.443683 |
| 10 | 8 | 0 | 9.274992  | 2.696818  | -0.337178 |
| 11 | 6 | 0 | 8.181949  | 3.354826  | 0.273640  |
| 12 | 1 | 0 | 7.231905  | 3.084690  | -0.202518 |
| 13 | 1 | 0 | 8.122732  | 3.128334  | 1.344785  |
| 14 | 1 | 0 | 8.358837  | 4.422632  | 0.141681  |
| 15 | 6 | 0 | 7.356930  | -1.681415 | 0.947183  |
| 16 | 1 | 0 | 7.567730  | -1.686041 | 2.025132  |
| 17 | 1 | 0 | 7.450260  | -2.730871 | 0.609525  |
| 18 | 6 | 0 | 5.542010  | -1.326811 | -0.597846 |
| 19 | 6 | 0 | 5.071398  | -1.804207 | 1.691462  |
| 20 | 6 | 0 | 4.175691  | -0.684197 | -0.768522 |
| 21 | 1 | 0 | 5.478594  | -2.395543 | -0.879899 |
| 22 | 1 | 0 | 6.256767  | -0.842770 | -1.270936 |
| 23 | 6 | 0 | 3.697453  | -1.166561 | 1.562947  |
| 24 | 1 | 0 | 4.983541  | -2.890892 | 1.499977  |
| 25 | 1 | 0 | 5.436297  | -1.672653 | 2.716193  |
| 26 | 1 | 0 | 3.807268  | -0.867844 | -1.782258 |
| 27 | 1 | 0 | 4.282937  | 0.407160  | -0.642862 |
| 28 | 1 | 0 | 2.987135  | -1.690460 | 2.209535  |
| 29 | 1 | 0 | 3.762954  | -0.121645 | 1.912230  |
| 30 | 7 | 0 | 6.007006  | -1.172040 | 0.773499  |
| 31 | 7 | 0 | 3.247011  | -1.279619 | 0.182602  |
| 32 | 6 | 0 | 1.857472  | -1.116401 | -0.068026 |
| 33 | 6 | 0 | 1.168035  | 0.133394  | 0.051489  |
| 34 | 6 | 0 | 1.149507  | -2.242365 | -0.447048 |
| 35 | 6 | 0 | 1.804085  | 1.341173  | 0.432361  |
| 36 | 6 | 0 | -0.230183 | 0.173351  | -0.225692 |
| 37 | 6 | 0 | -0.226358 | -2.193971 | -0.716699 |
| 38 | 1 | 0 | 1.691503  | -3.178453 | -0.531209 |
| 39 | 6 | 0 | 1.097462  | 2.519291  | 0.534743  |
| 40 | 1 | 0 | 2.865699  | 1.338383  | 0.647014  |
| 41 | 6 | 0 | -0.935787 | 1.394383  | -0.114160 |
| 42 | 6 | 0 | -0.913934 | -1.002868 | -0.609396 |
| 43 | 1 | 0 | -0.766404 | -3.087733 | -1.011672 |
| 44 | 6 | 0 | -0.279562 | 2.549232  | 0.261741  |
| 45 | 1 | 0 | 1.606836  | 3.431187  | 0.828619  |
| 46 | 1 | 0 | -0.845805 | 3.471367  | 0.340515  |
| 47 | 6 | 0 | -2.360178 | -0.972072 | -0.895648 |
| 48 | 6 | 0 | -2.383931 | 1.449840  | -0.396490 |
| 49 | 8 | 0 | -2.989529 | -1.969610 | -1.221438 |
| 50 | 8 | 0 | -3.033383 | 2.482700  | -0.304476 |
| 51 | 7 | 0 | -2.998701 | 0.261546  | -0.784508 |
| 52 | 6 | 0 | -4.439399 | 0.306160  | -1.068549 |
| 53 | 1 | 0 | -4.634753 | -0.450173 | -1.828643 |
| 54 | 1 | 0 | -4.651253 | 1.294556  | -1.476326 |

|    |    |   |           |           |           |
|----|----|---|-----------|-----------|-----------|
| 55 | 6  | 0 | -5.267755 | 0.051902  | 0.151668  |
| 56 | 6  | 0 | -5.750505 | 1.038458  | 1.065389  |
| 57 | 6  | 0 | -5.712945 | -1.222704 | 0.619247  |
| 58 | 1  | 0 | -5.589655 | 2.104537  | 0.974404  |
| 59 | 6  | 0 | -6.498004 | 0.377472  | 2.079826  |
| 60 | 1  | 0 | -5.518345 | -2.168586 | 0.131352  |
| 61 | 6  | 0 | -6.474507 | -1.020643 | 1.804134  |
| 62 | 1  | 0 | -7.018593 | 0.854821  | 2.899842  |
| 63 | 1  | 0 | -6.973807 | -1.790167 | 2.378456  |
| 64 | 6  | 0 | -8.829607 | -1.038152 | -0.548507 |
| 65 | 6  | 0 | -8.071664 | -0.399223 | -1.571802 |
| 66 | 1  | 0 | -7.557527 | -0.894024 | -2.385551 |
| 67 | 6  | 0 | -8.081478 | 1.002859  | -1.316232 |
| 68 | 1  | 0 | -7.576096 | 1.759788  | -1.901920 |
| 69 | 6  | 0 | -9.307676 | -0.031783 | 0.338953  |
| 70 | 1  | 0 | -9.895566 | -0.198762 | 1.232107  |
| 71 | 6  | 0 | -8.845358 | 1.229372  | -0.135084 |
| 72 | 1  | 0 | -9.020292 | 2.188407  | 0.334822  |
| 73 | 1  | 0 | -8.990467 | -2.103572 | -0.447598 |
| 74 | 26 | 0 | -7.281591 | -0.001360 | 0.249908  |
| 75 | 1  | 0 | 11.149130 | 1.361364  | -1.386606 |

-----  
**A-2W<sub>ud-m1</sub>** (PBE0/6-31G(d,p) in water solvent)

| Center<br>Number | Atomic<br>Number | Atomic<br>Type | Coordinates (Angstroms) |           |           |
|------------------|------------------|----------------|-------------------------|-----------|-----------|
|                  |                  |                | X                       | Y         | Z         |
| 1                | 6                | 0              | -7.061520               | -1.983654 | -0.607378 |
| 2                | 6                | 0              | -7.361734               | -3.306093 | -0.290022 |
| 3                | 6                | 0              | -8.014940               | -0.982396 | -0.388672 |
| 4                | 6                | 0              | -8.615643               | -3.628297 | 0.232929  |
| 5                | 1                | 0              | -6.619504               | -4.083457 | -0.450348 |
| 6                | 6                | 0              | -9.262564               | -1.309180 | 0.142143  |
| 7                | 1                | 0              | -7.748490               | 0.040734  | -0.629023 |
| 8                | 6                | 0              | -9.565110               | -2.642067 | 0.451013  |
| 9                | 1                | 0              | -8.850564               | -4.659834 | 0.479982  |
| 10               | 8                | 0              | -10.246232              | -0.408524 | 0.392998  |
| 11               | 6                | 0              | -9.985022               | 0.950895  | 0.101778  |
| 12               | 1                | 0              | -9.140672               | 1.333235  | 0.687566  |
| 13               | 1                | 0              | -9.778971               | 1.102168  | -0.964414 |
| 14               | 1                | 0              | -10.887989              | 1.498017  | 0.374141  |
| 15               | 6                | 0              | -5.733806               | -1.626797 | -1.234574 |
| 16               | 1                | 0              | -5.872904               | -1.521832 | -2.318930 |
| 17               | 1                | 0              | -5.026399               | -2.465698 | -1.093004 |
| 18               | 6                | 0              | -4.764838               | -0.469269 | 0.641036  |
| 19               | 6                | 0              | -4.077589               | 0.088498  | -1.566376 |

|    |   |   |           |           |           |
|----|---|---|-----------|-----------|-----------|
| 20 | 6 | 0 | -4.273660 | 0.886459  | 1.132646  |
| 21 | 1 | 0 | -3.978910 | -1.239144 | 0.759212  |
| 22 | 1 | 0 | -5.616304 | -0.777078 | 1.256351  |
| 23 | 6 | 0 | -3.614471 | 1.465359  | -1.112918 |
| 24 | 1 | 0 | -3.226924 | -0.618740 | -1.537755 |
| 25 | 1 | 0 | -4.411326 | 0.163681  | -2.607579 |
| 26 | 1 | 0 | -3.940157 | 0.835779  | 2.171225  |
| 27 | 1 | 0 | -5.114890 | 1.589323  | 1.093745  |
| 28 | 1 | 0 | -2.780672 | 1.791137  | -1.734246 |
| 29 | 1 | 0 | -4.431040 | 2.186894  | -1.228424 |
| 30 | 7 | 0 | -5.190348 | -0.369908 | -0.746745 |
| 31 | 7 | 0 | -3.210118 | 1.468805  | 0.307650  |
| 32 | 6 | 0 | -1.874965 | 1.191377  | 0.611105  |
| 33 | 6 | 0 | -0.839485 | 2.041176  | 0.076853  |
| 34 | 6 | 0 | -1.502362 | 0.150441  | 1.460533  |
| 35 | 6 | 0 | -1.107093 | 3.252164  | -0.606857 |
| 36 | 6 | 0 | 0.522262  | 1.689316  | 0.300547  |
| 37 | 6 | 0 | -0.157009 | -0.144845 | 1.709167  |
| 38 | 1 | 0 | -2.258025 | -0.478362 | 1.915031  |
| 39 | 6 | 0 | -0.085683 | 4.022371  | -1.122771 |
| 40 | 1 | 0 | -2.127910 | 3.613190  | -0.680049 |
| 41 | 6 | 0 | 1.552509  | 2.482220  | -0.257324 |
| 42 | 6 | 0 | 0.855530  | 0.580796  | 1.112185  |
| 43 | 1 | 0 | 0.105823  | -0.979309 | 2.351610  |
| 44 | 6 | 0 | 1.249916  | 3.622774  | -0.974935 |
| 45 | 1 | 0 | -0.317006 | 4.951307  | -1.633518 |
| 46 | 1 | 0 | 2.061904  | 4.212277  | -1.387644 |
| 47 | 6 | 0 | 2.255493  | 0.208072  | 1.346663  |
| 48 | 6 | 0 | 2.968384  | 2.111225  | -0.063464 |
| 49 | 8 | 0 | 2.582943  | -0.747537 | 2.039853  |
| 50 | 8 | 0 | 3.887554  | 2.742598  | -0.569081 |
| 51 | 7 | 0 | 3.227968  | 1.002346  | 0.736149  |
| 52 | 6 | 0 | 4.633654  | 0.629892  | 0.941628  |
| 53 | 1 | 0 | 4.699205  | 0.179492  | 1.931905  |
| 54 | 1 | 0 | 5.212559  | 1.553206  | 0.922666  |
| 55 | 6 | 0 | 5.128043  | -0.322500 | -0.102096 |
| 56 | 6 | 0 | 5.726746  | 0.028624  | -1.351515 |
| 57 | 6 | 0 | 5.063071  | -1.749026 | -0.041727 |
| 58 | 1 | 0 | 5.919669  | 1.038362  | -1.688644 |
| 59 | 6 | 0 | 6.041768  | -1.172478 | -2.047460 |
| 60 | 1 | 0 | 4.665452  | -2.320575 | 0.786372  |
| 61 | 6 | 0 | 5.631349  | -2.271749 | -1.237484 |
| 62 | 1 | 0 | 6.528860  | -1.240354 | -3.011479 |
| 63 | 1 | 0 | 5.752505  | -3.319614 | -1.479313 |
| 64 | 6 | 0 | 7.974574  | -1.775964 | 1.382979  |
| 65 | 6 | 0 | 8.042482  | -0.355386 | 1.288818  |
| 66 | 1 | 0 | 7.677715  | 0.349030  | 2.025245  |
| 67 | 6 | 0 | 8.650969  | -0.024980 | 0.043013  |

|    |    |   |            |           |           |
|----|----|---|------------|-----------|-----------|
| 68 | 1  | 0 | 8.828814   | 0.974148  | -0.332699 |
| 69 | 6  | 0 | 8.539956   | -2.323285 | 0.194876  |
| 70 | 1  | 0 | 8.619839   | -3.375463 | -0.045167 |
| 71 | 6  | 0 | 8.957998   | -1.241243 | -0.633130 |
| 72 | 1  | 0 | 9.410943   | -1.327634 | -1.612132 |
| 73 | 1  | 0 | 7.549437   | -2.339410 | 2.203238  |
| 74 | 26 | 0 | 6.972977   | -1.120245 | -0.250370 |
| 75 | 8  | 0 | -1.329359  | -2.236216 | -1.031022 |
| 76 | 1  | 0 | -1.143036  | -1.585598 | -0.343890 |
| 77 | 1  | 0 | -1.944210  | -2.842130 | -0.604564 |
| 78 | 1  | 0 | -10.541821 | -2.875660 | 0.863356  |
| 79 | 8  | 0 | -4.180143  | 4.208402  | 0.539934  |
| 80 | 1  | 0 | -3.734747  | 3.353314  | 0.668031  |
| 81 | 1  | 0 | -3.731531  | 4.797785  | 1.154678  |

-----

**A-2W<sub>ud</sub>-m<sub>2</sub>** (PBE0/6-31G(d,p) in water solvent)

| Center<br>Number | Atomic<br>Number | Atomic<br>Type | Coordinates (Angstroms) |           |           |
|------------------|------------------|----------------|-------------------------|-----------|-----------|
|                  |                  |                | X                       | Y         | Z         |
| 1                | 6                | 0              | 8.111839                | -0.621391 | 0.276689  |
| 2                | 6                | 0              | 9.142616                | -1.209607 | -0.451871 |
| 3                | 6                | 0              | 8.001064                | 0.773960  | 0.323785  |
| 4                | 6                | 0              | 10.064036               | -0.406383 | -1.127656 |
| 5                | 1                | 0              | 9.225661                | -2.292266 | -0.493992 |
| 6                | 6                | 0              | 8.924428                | 1.571071  | -0.352198 |
| 7                | 1                | 0              | 7.173415                | 1.211456  | 0.870946  |
| 8                | 6                | 0              | 9.962284                | 0.974947  | -1.082379 |
| 9                | 1                | 0              | 10.867244               | -0.864902 | -1.697709 |
| 10               | 8                | 0              | 8.901580                | 2.927422  | -0.363024 |
| 11               | 6                | 0              | 7.942663                | 3.578082  | 0.452256  |
| 12               | 1                | 0              | 6.915835                | 3.322361  | 0.166778  |
| 13               | 1                | 0              | 8.088148                | 3.327491  | 1.510371  |
| 14               | 1                | 0              | 8.105345                | 4.647367  | 0.311670  |
| 15               | 6                | 0              | 7.129869                | -1.470168 | 1.049837  |
| 16               | 1                | 0              | 7.325221                | -1.350527 | 2.123671  |
| 17               | 1                | 0              | 7.307440                | -2.536922 | 0.816725  |
| 18               | 6                | 0              | 5.319217                | -1.405774 | -0.537366 |
| 19               | 6                | 0              | 4.848589                | -1.715705 | 1.777202  |
| 20               | 6                | 0              | 3.909678                | -0.894360 | -0.785727 |

|    |   |   |           |           |           |
|----|---|---|-----------|-----------|-----------|
| 21 | 1 | 0 | 5.359395  | -2.495878 | -0.722120 |
| 22 | 1 | 0 | 5.999826  | -0.923241 | -1.245910 |
| 23 | 6 | 0 | 3.429949  | -1.206377 | 1.582151  |
| 24 | 1 | 0 | 4.859679  | -2.817911 | 1.686589  |
| 25 | 1 | 0 | 5.177696  | -1.462114 | 2.790932  |
| 26 | 1 | 0 | 3.575361  | -1.199547 | -1.781856 |
| 27 | 1 | 0 | 3.927004  | 0.203315  | -0.751066 |
| 28 | 1 | 0 | 2.752413  | -1.726099 | 2.265985  |
| 29 | 1 | 0 | 3.402904  | -0.134192 | 1.825332  |
| 30 | 7 | 0 | 5.745392  | -1.087748 | 0.818367  |
| 31 | 7 | 0 | 2.994438  | -1.477774 | 0.205772  |
| 32 | 6 | 0 | 1.593329  | -1.283428 | -0.040648 |
| 33 | 6 | 0 | 0.947276  | -0.002849 | -0.028149 |
| 34 | 6 | 0 | 0.843371  | -2.417610 | -0.292916 |
| 35 | 6 | 0 | 1.615362  | 1.221808  | 0.227764  |
| 36 | 6 | 0 | -0.456331 | 0.050797  | -0.287681 |
| 37 | 6 | 0 | -0.534613 | -2.349854 | -0.544388 |
| 38 | 1 | 0 | 1.346069  | -3.379679 | -0.290310 |
| 39 | 6 | 0 | 0.936543  | 2.420707  | 0.226183  |
| 40 | 1 | 0 | 2.680405  | 1.246908  | 0.423962  |
| 41 | 6 | 0 | -1.130426 | 1.295346  | -0.283379 |
| 42 | 6 | 0 | -1.182922 | -1.133940 | -0.546197 |
| 43 | 1 | 0 | -1.105608 | -3.251142 | -0.741941 |
| 44 | 6 | 0 | -0.442101 | 2.464154  | -0.028613 |
| 45 | 1 | 0 | 1.480490  | 3.339011  | 0.422729  |
| 46 | 1 | 0 | -0.984850 | 3.403600  | -0.031174 |
| 47 | 6 | 0 | -2.632080 | -1.089224 | -0.818755 |
| 48 | 6 | 0 | -2.580711 | 1.365729  | -0.551232 |
| 49 | 8 | 0 | -3.291717 | -2.095349 | -1.041865 |
| 50 | 8 | 0 | -3.199292 | 2.421541  | -0.548614 |
| 51 | 7 | 0 | -3.234944 | 0.165872  | -0.819425 |
| 52 | 6 | 0 | -4.676091 | 0.226298  | -1.098041 |
| 53 | 1 | 0 | -4.898721 | -0.587582 | -1.788026 |
| 54 | 1 | 0 | -4.862011 | 1.180924  | -1.589984 |
| 55 | 6 | 0 | -5.503955 | 0.104012  | 0.143011  |
| 56 | 6 | 0 | -5.922828 | 1.177953  | 0.988182  |
| 57 | 6 | 0 | -6.001050 | -1.109811 | 0.710769  |
| 58 | 1 | 0 | -5.707511 | 2.224652  | 0.819429  |
| 59 | 6 | 0 | -6.684469 | 0.630598  | 2.058842  |
| 60 | 1 | 0 | -5.855048 | -2.098169 | 0.295700  |
| 61 | 6 | 0 | -6.733096 | -0.783982 | 1.887191  |
| 62 | 1 | 0 | -7.163152 | 1.191596  | 2.850876  |
| 63 | 1 | 0 | -7.255137 | -1.484178 | 2.526228  |
| 64 | 6 | 0 | -9.433911 | -0.468910 | 0.122653  |
| 65 | 6 | 0 | -8.703007 | -0.804472 | -1.053734 |
| 66 | 1 | 0 | -8.543032 | -1.802456 | -1.440343 |
| 67 | 6 | 0 | -8.195937 | 0.402986  | -1.616250 |
| 68 | 1 | 0 | -7.583836 | 0.482498  | -2.505413 |

|    |    |   |           |           |           |
|----|----|---|-----------|-----------|-----------|
| 69 | 6  | 0 | -9.379260 | 0.945736  | 0.286836  |
| 70 | 1  | 0 | -9.823297 | 1.509552  | 1.096774  |
| 71 | 6  | 0 | -8.614448 | 1.484811  | -0.788006 |
| 72 | 1  | 0 | -8.375392 | 2.529574  | -0.937441 |
| 73 | 1  | 0 | -9.926965 | -1.167556 | 0.785868  |
| 74 | 26 | 0 | -7.514159 | 0.157366  | 0.273854  |
| 75 | 1  | 0 | 10.670172 | 1.613401  | -1.601984 |
| 76 | 8  | 0 | 3.482087  | -4.356792 | -0.092382 |
| 77 | 1  | 0 | 3.355510  | -3.389933 | 0.006145  |
| 78 | 1  | 0 | 3.601757  | -4.473254 | -1.040727 |
| 79 | 8  | 0 | 4.538435  | 2.649634  | 0.415856  |
| 80 | 1  | 0 | 4.344835  | 3.165328  | -0.374267 |
| 81 | 1  | 0 | 4.438682  | 3.282014  | 1.135591  |

-----

**A-THF<sub>u</sub>** (PBE0/6-31G(d,p) in THF solvent)

| Center<br>Number | Atomic<br>Number | Atomic<br>Type | Coordinates (Angstroms) |           |           |
|------------------|------------------|----------------|-------------------------|-----------|-----------|
|                  |                  |                | X                       | Y         | Z         |
| 1                | 6                | 0              | -7.999005               | -0.391049 | 0.567592  |
| 2                | 6                | 0              | -9.145124               | 0.256368  | 0.113654  |
| 3                | 6                | 0              | -7.796010               | -1.741519 | 0.260977  |
| 4                | 6                | 0              | -10.091067              | -0.446920 | -0.634633 |
| 5                | 1                | 0              | -9.300061               | 1.307319  | 0.342849  |
| 6                | 6                | 0              | -8.740480               | -2.436499 | -0.493534 |
| 7                | 1                | 0              | -6.886009               | -2.214896 | 0.612212  |
| 8                | 6                | 0              | -9.897175               | -1.784598 | -0.940850 |
| 9                | 1                | 0              | -10.985578              | 0.057841  | -0.988701 |
| 10               | 8                | 0              | -8.628433               | -3.742953 | -0.843621 |
| 11               | 6                | 0              | -7.477578               | -4.442570 | -0.415643 |
| 12               | 1                | 0              | -6.560916               | -3.997961 | -0.821799 |
| 13               | 1                | 0              | -7.406717               | -4.471732 | 0.678332  |
| 14               | 1                | 0              | -7.582007               | -5.459290 | -0.795716 |
| 15               | 6                | 0              | -6.995559               | 0.336598  | 1.431988  |
| 16               | 1                | 0              | -7.172990               | 0.065332  | 2.481438  |
| 17               | 1                | 0              | -7.175240               | 1.426354  | 1.359494  |
| 18               | 6                | 0              | -5.209444               | 0.503934  | -0.175613 |
| 19               | 6                | 0              | -4.702881               | 0.458370  | 2.154102  |
| 20               | 6                | 0              | -3.805410               | 0.032142  | -0.514160 |
| 21               | 1                | 0              | -5.236610               | 1.611485  | -0.194386 |
| 22               | 1                | 0              | -5.907895               | 0.138738  | -0.935218 |
| 23               | 6                | 0              | -3.290021               | -0.018299 | 1.858939  |
| 24               | 1                | 0              | -4.704263               | 1.563138  | 2.230841  |
| 25               | 1                | 0              | -5.023948               | 0.056358  | 3.121653  |

|    |   |   |           |           |           |
|----|---|---|-----------|-----------|-----------|
| 26 | 1 | 0 | -3.483477 | 0.483814  | -1.457613 |
| 27 | 1 | 0 | -3.830519 | -1.061796 | -0.659312 |
| 28 | 1 | 0 | -2.600225 | 0.394629  | 2.601106  |
| 29 | 1 | 0 | -3.268217 | -1.117356 | 1.955812  |
| 30 | 7 | 0 | -5.617822 | -0.007288 | 1.124089  |
| 31 | 7 | 0 | -2.889503 | 0.448738  | 0.538819  |
| 32 | 6 | 0 | -1.497902 | 0.426746  | 0.236965  |
| 33 | 6 | 0 | -0.744793 | -0.780471 | 0.065093  |
| 34 | 6 | 0 | -0.858986 | 1.646922  | 0.110188  |
| 35 | 6 | 0 | -1.309253 | -2.076587 | 0.167647  |
| 36 | 6 | 0 | 0.647822  | -0.683240 | -0.227263 |
| 37 | 6 | 0 | 0.512433  | 1.728744  | -0.179149 |
| 38 | 1 | 0 | -1.436019 | 2.559679  | 0.239252  |
| 39 | 6 | 0 | -0.541803 | -3.207656 | -0.004236 |
| 40 | 1 | 0 | -2.365139 | -2.181005 | 0.384648  |
| 41 | 6 | 0 | 1.417194  | -1.858177 | -0.397417 |
| 42 | 6 | 0 | 1.262724  | 0.583857  | -0.346207 |
| 43 | 1 | 0 | 1.001134  | 2.693349  | -0.272120 |
| 44 | 6 | 0 | 0.829458  | -3.101876 | -0.286359 |
| 45 | 1 | 0 | -0.998861 | -4.188359 | 0.079604  |
| 46 | 1 | 0 | 1.445488  | -3.984835 | -0.421266 |
| 47 | 6 | 0 | 2.702453  | 0.696793  | -0.645732 |
| 48 | 6 | 0 | 2.861614  | -1.771353 | -0.694008 |
| 49 | 8 | 0 | 3.271632  | 1.774132  | -0.752336 |
| 50 | 8 | 0 | 3.563903  | -2.762226 | -0.838376 |
| 51 | 7 | 0 | 3.406566  | -0.494915 | -0.812198 |
| 52 | 6 | 0 | 4.843610  | -0.396749 | -1.099926 |
| 53 | 1 | 0 | 4.988319  | 0.519790  | -1.671764 |
| 54 | 1 | 0 | 5.102811  | -1.257297 | -1.716731 |
| 55 | 6 | 0 | 5.670970  | -0.375251 | 0.147115  |
| 56 | 6 | 0 | 6.215435  | -1.512739 | 0.819054  |
| 57 | 6 | 0 | 6.034459  | 0.784561  | 0.898779  |
| 58 | 1 | 0 | 6.114142  | -2.538258 | 0.489719  |
| 59 | 6 | 0 | 6.922268  | -1.055270 | 1.966346  |
| 60 | 1 | 0 | 5.772119  | 1.801856  | 0.640634  |
| 61 | 6 | 0 | 6.809968  | 0.365092  | 2.015850  |
| 62 | 1 | 0 | 7.468494  | -1.674462 | 2.665862  |
| 63 | 1 | 0 | 7.255940  | 1.012366  | 2.759650  |
| 64 | 6 | 0 | 9.509717  | 0.636205  | 0.243807  |
| 65 | 6 | 0 | 8.733773  | 1.062051  | -0.872771 |
| 66 | 1 | 0 | 8.457020  | 2.082445  | -1.103166 |
| 67 | 6 | 0 | 8.362903  | -0.094907 | -1.617562 |
| 68 | 1 | 0 | 7.756400  | -0.106681 | -2.513956 |
| 69 | 6 | 0 | 9.618887  | -0.783521 | 0.188794  |
| 70 | 1 | 0 | 10.133270 | -1.410060 | 0.905592  |
| 71 | 6 | 0 | 8.910310  | -1.235594 | -0.961726 |
| 72 | 1 | 0 | 8.791497  | -2.265463 | -1.271802 |
| 73 | 1 | 0 | 9.926573  | 1.276910  | 1.009757  |

|    |    |   |            |           |           |
|----|----|---|------------|-----------|-----------|
| 74 | 26 | 0 | 7.675890   | -0.221453 | 0.282331  |
| 75 | 1  | 0 | -10.619466 | -2.344160 | -1.526960 |
| 76 | 6  | 0 | -3.482694  | 4.617787  | 0.765396  |
| 77 | 8  | 0 | -2.200958  | 4.707324  | 0.136086  |
| 78 | 6  | 0 | -2.368112  | 4.910691  | -1.265602 |
| 79 | 6  | 0 | -3.794378  | 4.485882  | -1.580227 |
| 80 | 6  | 0 | -4.520148  | 4.926091  | -0.310655 |
| 81 | 1  | 0 | -3.607945  | 3.599156  | 1.157846  |
| 82 | 1  | 0 | -3.518288  | 5.318128  | 1.607592  |
| 83 | 1  | 0 | -2.211895  | 5.972465  | -1.509125 |
| 84 | 1  | 0 | -1.608812  | 4.323178  | -1.792164 |
| 85 | 1  | 0 | -4.184435  | 4.947761  | -2.490709 |
| 86 | 1  | 0 | -3.849104  | 3.397176  | -1.694624 |
| 87 | 1  | 0 | -4.730024  | 6.000568  | -0.348167 |
| 88 | 1  | 0 | -5.464563  | 4.401627  | -0.142289 |

-----

**A-THF<sub>a</sub>** (PBE0/6-31G(d,p) in THF solvent)

| Center<br>Number | Atomic<br>Number | Atomic<br>Type | Coordinates (Angstroms) |           |           |
|------------------|------------------|----------------|-------------------------|-----------|-----------|
|                  |                  |                | X                       | Y         | Z         |
| 1                | 6                | 0              | -6.843145               | -2.381402 | 0.666365  |
| 2                | 6                | 0              | -7.290649               | -2.856085 | 1.896409  |
| 3                | 6                | 0              | -7.558520               | -1.375072 | 0.007106  |
| 4                | 6                | 0              | -8.454968               | -2.331371 | 2.461362  |
| 5                | 1                | 0              | -6.732472               | -3.631772 | 2.413888  |
| 6                | 6                | 0              | -8.718903               | -0.852267 | 0.577657  |
| 7                | 1                | 0              | -7.173522               | -1.006757 | -0.936932 |
| 8                | 6                | 0              | -9.169460               | -1.335881 | 1.813446  |
| 9                | 1                | 0              | -8.804336               | -2.700306 | 3.421664  |
| 10               | 8                | 0              | -9.475313               | 0.122323  | 0.012006  |
| 11               | 6                | 0              | -9.083880               | 0.600655  | -1.263856 |
| 12               | 1                | 0              | -8.095752               | 1.074686  | -1.228328 |
| 13               | 1                | 0              | -9.079077               | -0.206652 | -2.006232 |
| 14               | 1                | 0              | -9.832685               | 1.341655  | -1.547287 |
| 15               | 6                | 0              | -5.617148               | -2.970866 | 0.007070  |
| 16               | 1                | 0              | -5.939164               | -3.672783 | -0.773869 |
| 17               | 1                | 0              | -5.053100               | -3.568130 | 0.747944  |
| 18               | 6                | 0              | -4.099194               | -1.128122 | 0.337088  |
| 19               | 6                | 0              | -3.823715               | -2.545854 | -1.554818 |
| 20               | 6                | 0              | -3.356294               | 0.010853  | -0.352331 |
| 21               | 1                | 0              | -3.383512               | -1.719098 | 0.942863  |

|    |   |   |           |           |           |
|----|---|---|-----------|-----------|-----------|
| 22 | 1 | 0 | -4.838361 | -0.702182 | 1.023348  |
| 23 | 6 | 0 | -3.075875 | -1.425634 | -2.268355 |
| 24 | 1 | 0 | -3.107892 | -3.212512 | -1.035695 |
| 25 | 1 | 0 | -4.358145 | -3.149984 | -2.296578 |
| 26 | 1 | 0 | -2.815548 | 0.583775  | 0.401196  |
| 27 | 1 | 0 | -4.081091 | 0.676338  | -0.837380 |
| 28 | 1 | 0 | -2.347304 | -1.822037 | -2.978192 |
| 29 | 1 | 0 | -3.808926 | -0.840544 | -2.838849 |
| 30 | 7 | 0 | -4.785473 | -1.965966 | -0.632694 |
| 31 | 7 | 0 | -2.417438 | -0.505757 | -1.352062 |
| 32 | 6 | 0 | -1.074633 | -0.638332 | -1.063514 |
| 33 | 6 | 0 | -0.329376 | 0.501650  | -0.580883 |
| 34 | 6 | 0 | -0.381283 | -1.832763 | -1.277624 |
| 35 | 6 | 0 | -0.860194 | 1.811568  | -0.556520 |
| 36 | 6 | 0 | 1.028340  | 0.325500  | -0.189751 |
| 37 | 6 | 0 | 0.960649  | -1.969199 | -0.925638 |
| 38 | 1 | 0 | -0.906286 | -2.699660 | -1.660966 |
| 39 | 6 | 0 | -0.124589 | 2.877492  | -0.078987 |
| 40 | 1 | 0 | -1.853488 | 1.987396  | -0.954701 |
| 41 | 6 | 0 | 1.757949  | 1.426374  | 0.317974  |
| 42 | 6 | 0 | 1.666441  | -0.925157 | -0.352659 |
| 43 | 1 | 0 | 1.464058  | -2.921384 | -1.061481 |
| 44 | 6 | 0 | 1.182217  | 2.680669  | 0.386999  |
| 45 | 1 | 0 | -0.553947 | 3.874097  | -0.079865 |
| 46 | 1 | 0 | 1.772370  | 3.504082  | 0.775954  |
| 47 | 6 | 0 | 3.058919  | -1.119134 | 0.052115  |
| 48 | 6 | 0 | 3.156865  | 1.254085  | 0.756212  |
| 49 | 8 | 0 | 3.653164  | -2.184522 | -0.070907 |
| 50 | 8 | 0 | 3.816225  | 2.171536  | 1.229595  |
| 51 | 7 | 0 | 3.709630  | -0.014040 | 0.612048  |
| 52 | 6 | 0 | 5.101836  | -0.195697 | 1.038564  |
| 53 | 1 | 0 | 5.200375  | -1.233494 | 1.356904  |
| 54 | 1 | 0 | 5.262135  | 0.465401  | 1.890502  |
| 55 | 6 | 0 | 6.078571  | 0.111860  | -0.053566 |
| 56 | 6 | 0 | 6.675560  | 1.382287  | -0.319519 |
| 57 | 6 | 0 | 6.563862  | -0.806200 | -1.035105 |
| 58 | 1 | 0 | 6.506167  | 2.282006  | 0.256652  |
| 59 | 6 | 0 | 7.533772  | 1.243798  | -1.446383 |
| 60 | 1 | 0 | 6.295493  | -1.852463 | -1.095191 |
| 61 | 6 | 0 | 7.464362  | -0.109649 | -1.889101 |
| 62 | 1 | 0 | 8.148531  | 2.022914  | -1.877908 |
| 63 | 1 | 0 | 8.017190  | -0.537347 | -2.715306 |
| 64 | 6 | 0 | 8.987571  | -1.570943 | 0.975357  |
| 65 | 6 | 0 | 8.532996  | -0.605887 | 1.920340  |
| 66 | 1 | 0 | 7.819149  | -0.780980 | 2.714858  |
| 67 | 6 | 0 | 9.164216  | 0.636089  | 1.620339  |
| 68 | 1 | 0 | 9.013230  | 1.569526  | 2.146477  |
| 69 | 6 | 0 | 9.898876  | -0.924958 | 0.090737  |

|    |    |   |            |           |           |
|----|----|---|------------|-----------|-----------|
| 70 | 1  | 0 | 10.404525  | -1.384767 | -0.748213 |
| 71 | 6  | 0 | 10.008074  | 0.438794  | 0.489394  |
| 72 | 1  | 0 | 10.611202  | 1.196338  | 0.006351  |
| 73 | 1  | 0 | 8.678838   | -2.606862 | 0.925698  |
| 74 | 26 | 0 | 8.088677   | -0.019787 | 0.034666  |
| 75 | 1  | 0 | -10.074192 | -0.915734 | 2.241699  |
| 76 | 6  | 0 | -6.252988  | 3.628704  | -0.923920 |
| 77 | 8  | 0 | -6.090657  | 2.277698  | -0.517380 |
| 78 | 6  | 0 | -6.348215  | 2.280095  | 0.879605  |
| 79 | 6  | 0 | -7.558189  | 3.200386  | 1.065966  |
| 80 | 6  | 0 | -7.466507  | 4.155664  | -0.144466 |
| 81 | 1  | 0 | -5.349317  | 4.205628  | -0.671213 |
| 82 | 1  | 0 | -6.379200  | 3.641677  | -2.009266 |
| 83 | 1  | 0 | -6.523648  | 1.247419  | 1.190679  |
| 84 | 1  | 0 | -5.471473  | 2.670112  | 1.421345  |
| 85 | 1  | 0 | -8.483027  | 2.618318  | 1.033408  |
| 86 | 1  | 0 | -7.525973  | 3.725147  | 2.024128  |
| 87 | 1  | 0 | -8.374028  | 4.102670  | -0.751689 |
| 88 | 1  | 0 | -7.327909  | 5.198515  | 0.152031  |

-----

**A-2THF<sub>ud</sub>** (PBE0/6-31G(d,p) in THF solvent)

| Center<br>Number | Atomic<br>Number | Atomic<br>Type | Coordinates (Angstroms) |           |           |
|------------------|------------------|----------------|-------------------------|-----------|-----------|
|                  |                  |                | X                       | Y         | Z         |
| 1                | 6                | 0              | -7.032104               | 1.334235  | -1.853669 |
| 2                | 6                | 0              | -7.488657               | 1.671536  | -3.125316 |
| 3                | 6                | 0              | -7.671496               | 0.319423  | -1.132594 |
| 4                | 6                | 0              | -8.588189               | 1.005012  | -3.668918 |
| 5                | 1                | 0              | -6.987259               | 2.451946  | -3.691522 |
| 6                | 6                | 0              | -8.762833               | -0.349829 | -1.685396 |
| 7                | 1                | 0              | -7.282866               | 0.066825  | -0.152375 |
| 8                | 6                | 0              | -9.226492               | -0.000934 | -2.960362 |
| 9                | 1                | 0              | -8.944875               | 1.268415  | -4.660739 |
| 10               | 8                | 0              | -9.439439               | -1.350589 | -1.065797 |
| 11               | 6                | 0              | -9.000462               | -1.745905 | 0.217588  |
| 12               | 1                | 0              | -7.969418               | -2.120813 | 0.193147  |
| 13               | 1                | 0              | -9.064126               | -0.921792 | 0.938308  |
| 14               | 1                | 0              | -9.666866               | -2.549827 | 0.531887  |
| 15               | 6                | 0              | -5.882936               | 2.088643  | -1.224846 |
| 16               | 1                | 0              | -6.291173               | 2.866410  | -0.565198 |
| 17               | 1                | 0              | -5.319399               | 2.619232  | -2.015759 |
| 18               | 6                | 0              | -4.247858               | 0.318570  | -1.224081 |
| 19               | 6                | 0              | -4.127679               | 2.024245  | 0.426798  |
| 20               | 6                | 0              | -3.450531               | -0.643602 | -0.351147 |

|    |   |   |           |           |           |
|----|---|---|-----------|-----------|-----------|
| 21 | 1 | 0 | -3.554120 | 0.860570  | -1.897318 |
| 22 | 1 | 0 | -4.930970 | -0.262469 | -1.852456 |
| 23 | 6 | 0 | -3.335319 | 1.087747  | 1.327464  |
| 24 | 1 | 0 | -3.432373 | 2.641724  | -0.173134 |
| 25 | 1 | 0 | -4.718114 | 2.705878  | 1.048645  |
| 26 | 1 | 0 | -2.841312 | -1.275798 | -0.996819 |
| 27 | 1 | 0 | -4.124884 | -1.293568 | 0.219020  |
| 28 | 1 | 0 | -2.663068 | 1.655964  | 1.970458  |
| 29 | 1 | 0 | -4.045903 | 0.549755  | 1.970149  |
| 30 | 7 | 0 | -5.022426 | 1.245221  | -0.414261 |
| 31 | 7 | 0 | -2.589918 | 0.085176  | 0.581284  |
| 32 | 6 | 0 | -1.235759 | 0.207470  | 0.374101  |
| 33 | 6 | 0 | -0.440651 | -0.965654 | 0.084592  |
| 34 | 6 | 0 | -0.580323 | 1.440202  | 0.485613  |
| 35 | 6 | 0 | -0.937581 | -2.283430 | 0.217549  |
| 36 | 6 | 0 | 0.931307  | -0.799847 | -0.261651 |
| 37 | 6 | 0 | 0.774088  | 1.563849  | 0.185986  |
| 38 | 1 | 0 | -1.138752 | 2.333462  | 0.750679  |
| 39 | 6 | 0 | -0.149575 | -3.378071 | -0.081745 |
| 40 | 1 | 0 | -1.941042 | -2.448799 | 0.599883  |
| 41 | 6 | 0 | 1.710797  | -1.934352 | -0.590720 |
| 42 | 6 | 0 | 1.532364  | 0.478772  | -0.225824 |
| 43 | 1 | 0 | 1.252173  | 2.537993  | 0.232603  |
| 44 | 6 | 0 | 1.169943  | -3.204487 | -0.518001 |
| 45 | 1 | 0 | -0.552552 | -4.378700 | 0.038251  |
| 46 | 1 | 0 | 1.797757  | -4.052886 | -0.770829 |
| 47 | 6 | 0 | 2.937111  | 0.661078  | -0.582205 |
| 48 | 6 | 0 | 3.122396  | -1.776978 | -0.987607 |
| 49 | 8 | 0 | 3.504351  | 1.749110  | -0.559613 |
| 50 | 8 | 0 | 3.825130  | -2.724952 | -1.319191 |
| 51 | 7 | 0 | 3.639086  | -0.485676 | -0.973867 |
| 52 | 6 | 0 | 5.045845  | -0.319708 | -1.354754 |
| 53 | 1 | 0 | 5.140617  | 0.679217  | -1.780319 |
| 54 | 1 | 0 | 5.259387  | -1.066175 | -2.120233 |
| 55 | 6 | 0 | 5.975017  | -0.483356 | -0.192190 |
| 56 | 6 | 0 | 6.591925  | -1.699994 | 0.231971  |
| 57 | 6 | 0 | 6.384172  | 0.544867  | 0.711602  |
| 58 | 1 | 0 | 6.476200  | -2.658552 | -0.255782 |
| 59 | 6 | 0 | 7.387347  | -1.420098 | 1.378479  |
| 60 | 1 | 0 | 6.084530  | 1.582441  | 0.649299  |
| 61 | 6 | 0 | 7.258245  | -0.031628 | 1.675606  |
| 62 | 1 | 0 | 8.000072  | -2.131112 | 1.917172  |
| 63 | 1 | 0 | 7.756059  | 0.495447  | 2.479087  |
| 64 | 6 | 0 | 9.762467  | 0.667982  | -0.259123 |
| 65 | 6 | 0 | 8.879664  | 1.178952  | -1.254115 |
| 66 | 1 | 0 | 8.534274  | 2.201335  | -1.333723 |
| 67 | 6 | 0 | 8.509780  | 0.100801  | -2.109579 |
| 68 | 1 | 0 | 7.834799  | 0.161473  | -2.953508 |

|     |    |   |            |           |           |
|-----|----|---|------------|-----------|-----------|
| 69  | 6  | 0 | 9.938567   | -0.725468 | -0.499929 |
| 70  | 1  | 0 | 10.539182  | -1.402624 | 0.093112  |
| 71  | 6  | 0 | 9.164714   | -1.076074 | -1.643742 |
| 72  | 1  | 0 | 9.073692   | -2.065917 | -2.071353 |
| 73  | 1  | 0 | 10.205995  | 1.234723  | 0.548989  |
| 74  | 26 | 0 | 7.983173   | -0.295651 | -0.195833 |
| 75  | 1  | 0 | -10.077491 | -0.534341 | -3.372216 |
| 76  | 6  | 0 | -1.838634  | 5.298396  | 0.929244  |
| 77  | 8  | 0 | -1.932385  | 4.200662  | 1.835907  |
| 78  | 6  | 0 | -0.981170  | 4.368529  | 2.893319  |
| 79  | 6  | 0 | -0.304998  | 5.718377  | 2.663322  |
| 80  | 6  | 0 | -0.460602  | 5.899543  | 1.154751  |
| 81  | 1  | 0 | -1.995447  | 4.919155  | -0.085455 |
| 82  | 1  | 0 | -2.627702  | 6.033467  | 1.148938  |
| 83  | 1  | 0 | -1.500281  | 4.311765  | 3.856875  |
| 84  | 1  | 0 | -0.259198  | 3.542281  | 2.845166  |
| 85  | 1  | 0 | -0.840875  | 6.511995  | 3.195108  |
| 86  | 1  | 0 | 0.734492   | 5.727054  | 3.000030  |
| 87  | 1  | 0 | -0.393304  | 6.941105  | 0.830781  |
| 88  | 1  | 0 | 0.299162   | 5.321534  | 0.616638  |
| 89  | 6  | 0 | -4.011628  | -2.901003 | 3.037233  |
| 90  | 8  | 0 | -3.894613  | -3.277990 | 1.664009  |
| 91  | 6  | 0 | -4.936892  | -4.191441 | 1.319585  |
| 92  | 6  | 0 | -5.944280  | -4.130370 | 2.459884  |
| 93  | 6  | 0 | -5.032716  | -3.849454 | 3.652424  |
| 94  | 1  | 0 | -3.023582  | -2.962948 | 3.505393  |
| 95  | 1  | 0 | -4.354267  | -1.857806 | 3.098522  |
| 96  | 1  | 0 | -5.356240  | -3.896221 | 0.351600  |
| 97  | 1  | 0 | -4.517753  | -5.202944 | 1.217609  |
| 98  | 1  | 0 | -6.641808  | -3.298338 | 2.310141  |
| 99  | 1  | 0 | -6.525316  | -5.050586 | 2.558668  |
| 100 | 1  | 0 | -5.552254  | -3.410992 | 4.508037  |
| 101 | 1  | 0 | -4.546151  | -4.773271 | 3.984001  |

---
